1 Dual-located WHIRLY1 affects salicylic acid homeostasis *via* coordination of ICS1,  
2 PAL1 and BSMT1 during *Arabidopsis* plant aging

3 Wenfang Lin<sup>1</sup>, Hong Zhang<sup>1</sup>, Dongmei Huang<sup>1</sup>, Dirk Schenke <sup>3</sup>, Daguang Cai <sup>3</sup>,  
4 Binghua Wu\*<sup>2</sup>, Ying Miao\*<sup>1</sup>

5 1 Fujian Provincial Key Laboratory of Plant Functional Biology, College of Life  
6 Sciences, Fujian Agriculture and Forestry University, 350002 Fuzhou, China; 2  
7 College of Horticulture Science, Fujian Agriculture and Forestry University, 350002  
8 Fuzhou, China; 3 Department of Molecular Phytopathology, Christian-Albrechts  
9 University of Kiel, Germany

10 \*Corresponding author

11 Fujian Provincial Key Laboratory of Plant Functional Biology, Fujian Agriculture and  
12 Forestry University, Fuzhou 350002, China; Email: [ymiao@fafu.edu.cn](mailto:ymiao@fafu.edu.cn),  
13 [binghua.wu@fafu.edu.cn](mailto:binghua.wu@fafu.edu.cn), Phone: 0086 59186392987

14 Running head: WHY1 regulated SA homeostasis via ICS1, PAL1 and BSMT1

15 Article Length: main body of the text: 6843 words including Abstract 250,  
16 Introduction 838, Results 2599, Discussion 1522, Material and Methods 1503,  
17 Acknowledgements 131; 8 figures

18 The author responsible for distribution of materials integral to the findings presented in this article  
19 in accordance with the policy described in the Instructions for Authors is: Ying Miao

20 ([ymiao@fafu.edu.cn](mailto:ymiao@fafu.edu.cn)), Binghua Wu ([binghua.wu@fafu.edu.cn](mailto:binghua.wu@fafu.edu.cn)). Y.M. designed the study. W.F.L.

21 performed SA measurements, western blots, phenotyping, and qRT-PCR. D.H. performed,

22 ChIP-seq, ChIP-qPCR, H.Z. performed plasmid constructs and promoter activation activity and the

23 mutants screening. B.H.W performed microarray data analyses. W.F.L. and Y.M. analyzed the

24 data. Y.M. and D.S. wrote the paper. No conflict of interest.

25 Dual-located WHIRLY1 affects salicylic acid homeostasis *via* coordination of ICS1,  
26 PAL1 and BSMT1 during *Arabidopsis* plant aging

27

28 Abstract

29 Salicylic acid (SA) homeostasis determines also developmental senescence and is  
30 spatiotemporally controlled by various mechanisms, including biosynthesis, transport  
31 and conjugate formation. The alteration of WHIRLY1 (WHY1), a repressor of leaf  
32 natural senescence, with respect to allocation in the nucleus or chloroplast causes a  
33 perturbation in SA homeostasis, resulting in adverse plant senescence phenotypes.  
34 Loss of *WHY1* resulted in a 5 days earlier SA peak compared to wild type plants which  
35 accumulated SA at 42 days after germination. SA accumulation coincided with an  
36 early leaf senescence phenotype, which could be prevented by ectopic expression of  
37 the nuclear WHY1 isoform (nWHY1). However, expressing the plastid WHY1 isoform  
38 (pWHY1) greatly enhanced cellular SA levels. A global transcriptional analysis in  
39 WHY1 loss-of-function background by expressing either pWHY1 or nWHY1 indicated  
40 that hormone metabolism related genes were most significantly altered. The pWHY1  
41 isoform predominantly affected stress related gene expression, while the nWHY1  
42 controlled rather developmental gene expression. Chromatin  
43 immunoprecipitation-qPCR (ChIP-qPCR) assays indicated that nWHY1 directly binds  
44 to the promoter region of isochorismate synthase (*ICS1*) to activate *its* expression at  
45 later stage, but indirectly activated S-adenosyl-L-methionine-dependent  
46 methyltransferase (*BSMT1*) gene expression *via* ethylene response factor 109

47 (ERF109), while repressing phenylalanine ammonia lyase (*PAL1*) expression *via*  
48 R2R3-MYB member 15 (MYB15) at the early stage of development. Interestingly,  
49 rising SA levels exerted a feedback effect by inducing nWHY1 modification and  
50 pWHY1 accumulation. Thus, the alteration of WHY1 organelle isoforms and the  
51 feedback of SA intervened in a circularly integrated regulatory network during  
52 developmental or stress-induced senescence in *Arabidopsis*.

53

54 Keywords: dual-located WHIRLY1, SA homeostasis, plant senescence, feedback loop,  
55 *Arabidopsis thaliana*

56

57

58

59

60 Introduction

61 Salicylic acid is crucial for plant growth, responses to pathogens, e.g. by programmed  
62 cell death and environmental responses. Its homeostasis is temporally and spatially  
63 controlled by various mechanisms, including biosynthesis, transport and conjugate  
64 formation. For example, leaf development in *Arabidopsis* was regulated by SA  
65 biosynthetic / signaling genes. Early leaf senescence is a result of SA overproduction  
66 in mutants such as isochorismate synthase (ICS1) and phenylalanine ammonia lyase

67 (PAL) overexpression lines (Love et al., 2008; Rivas-San et al., 2011), whereas the  
68 hypersensitive response (a fast form of programmed cell death) have been intensively  
69 investigated in the S-adenosyl-L-methionine-dependent methyltransferase (*bsmt1*)  
70 mutant (Vlot et al., 2009). There are two main SA biosynthetic pathways in plants: the  
71 phenylalanine ammonia lyase (PAL) pathway and the isochorismate (IC) pathway,  
72 both depending on the primary metabolite chorismate (Dempsey et al. 2011). In the  
73 PAL pathway, the chorismate-derived L-phenylalanine is converted into SA *via* either  
74 benzoate intermediates or coumaric acid through a series of enzymatic reactions  
75 involving PAL, benzoic acid 2-hydroxylase (BA2H), and other uncharacterized  
76 enzymes (Leon et al. 1995b). Approximately 10% of defense-related SA is produced  
77 by the cytosolic PAL pathway and in *Arabidopsis* four PAL enzymes have been  
78 identified. In the IC pathway, chorismate is converted in a two-step process to SA *via*  
79 isochorismate involving isochorismate synthase (ICS) and isochorismate pyruvate  
80 lyase (IPL). In *Arabidopsis*, two ICS enzymes have been described to convert  
81 chorismate to isochorismate, but in recent studies another isochorismate synthase  
82 was identified (Rekhter et al. 2019; Torrens-Spence et al. 2019). This pathway  
83 accounts for ~90% of the SA production generated by the plastid-localized ICS1  
84 inducible by pathogens and UV light (Wildermuth et al. 2001; Garcion et al. 2008).  
85 Endogenous SA undergoes a series of chemical modifications including hydroxylation,  
86 glycosylation, methylation and amino acid conjugation. These modifications directly  
87 affect the biochemical properties of the SA derivatives, and play a pivotal role in SA

88 catabolism and homeostasis to regulate leaf senescence (Zhang et al. 2013). It has  
89 been shown that SA affects regulation of gene expression during leaf senescence  
90 (Morris et al. 2003; Vogelmann et al.2013; Zhang et al. 2013; 2017) and in advancing  
91 flowering time in *Arabidopsis thaliana* (Martínez et al. 2004), as well as in inhibiting  
92 seed germination (Alonso-Ramirez et al. 2009; Lee et al. 2013). Although SA  
93 biosynthesis and its function in both local and systemic acquired resistance (SAR)  
94 against microbial pathogens and in plant development were well understood (Park et  
95 al. 2007; An and Mou, 2011), the underlying molecular mechanism of free SA  
96 homeostasis in cells is less clear.

97 WHIRLY family proteins are dually located in both the nucleus and organelles, and  
98 perform numerous cellular functions in both locations ([Krause et al. 2005](#); [Grabowski  
99 et al. 2008](#)). In the nucleus, WHIRLY1 (WHY1) protein was found to regulate the  
100 expression of genes related to defense and senescence by binding to their respective  
101 promoters ([Desveaux et al. 2000](#); [Desveaux et al. 2004](#); [Xiong et al. 2009](#); [Miao et al.  
102 2013](#); [Krupinska et al. 2013](#)). WHY1 protein binds for example to the promoter of  
103 *WRKY53* and repress *WRKY53* and *WRKY33* expression in a  
104 development-dependent manner during early senescence in *Arabidopsis* ([Miao et al.  
105 2013](#); [Ren et al. 2017](#)), while it activates the *HvS40* gene during natural and  
106 stress-related senescence in barley (*Hordeum vulgare*) ([Krupinska et al. 2013](#)) and  
107 *PsbA* gene expression in response to chilling treatment in tomato (Zhuang et al. 2018).  
108 In the nucleus, WHY1 protein also modulates telomere length by binding to their

109 *AT*-rich region ([Yoo et al. 2007](#)) and affects microRNA synthesis (Swida-Barteczka et  
110 al. 2018). Moreover, in chloroplasts, WHY1 has a function on organelle genome  
111 stability, facilitating accurate DNA repair ([Cappadocia et al. 2010, 2012](#); [Lepage et al.](#)  
112 [2013](#)) and affects RNA editing/splicing (Prikryl et al., 2008; [Melonek et al. 2010](#)). The  
113 intracellular localization of WHY1 and/or the developmental stage of the plants may  
114 contribute to its various functions ([Ren et al. 2017](#)). Furthermore, WHY1 has been  
115 reported to be involved in (a)biotic stress signaling pathways, e.g. in response to  
116 chilling (Zhuang et al. 2018), high light (Kucharewicz et al. 2017), N deficiency  
117 (Comadira et al. 2013), reactive oxygen species (Lin et al. 2019; Lepage et al. 2013),  
118 hormones such as SA and abscisic acid (Xiong et al. 2009; Isemer et al. 2012) and  
119 defense signaling, being e.g. required for SA- and pathogen-induced PR1 expression  
120 (Desveaux et al. 2005).

121 In this study, we extend the roles of the dual-located WHY1 protein with respect to SA  
122 biosynthesis *via* regulating *PAL1* and *ICS1* expression and SA modification *via*  
123 affecting *BSMT1* gene expression, in a developmental dependent manner. Moreover,  
124 the cellular SA level affected the distribution and status of WHY1 protein in the  
125 nucleus and in plastids, suggesting a feedback mechanism to regulate SA  
126 homeostasis. Further, globally analysis of gene expression in loss-of WHY1 and  
127 gain-of pWHY1 or nWHY1 indicated that the levels of hormone metabolism related  
128 genes were significantly altered. Our results provide the first evidence that the  
129 dual-located WHY1 protein exerts a novel function in both nucleus and chloroplasts to

130 fine-tune SA homeostasis affecting plant aging in *Arabidopsis*.

131 Results

132 **WHY1 changes the gene expression level of *PAL*, *ICS* and *BSMT1* and SA**  
133 **contents during plant aging**

134 . To explore how WHY1 involves in the SA metabolism pathways (Figure 1a), we used  
135 the *why1-1* mutant previously deployed in several of our studies (Miao et al. 2013;  
136 Ren et al. 2017; Lin et al. 2019). This *why1-1* mutant displays an early senescence  
137 phenotype (Miao et al. 2013), similar to the S-adenosyl-L-methionine-dependent  
138 methyltransferase (*bsmt1*) mutant (Vlot et al. 2009) and the SA 3-hydroxylase (*s3h*)  
139 mutant (Zhang et al. 2013). We analyzed the expression levels of *ICS*, *PAL*, *BSMT1*,  
140 encoding a protein with both benzoic acid (BA) and SA carboxyl methyltransferase  
141 activities, and salicylic acid glucoside/glucose ester modification enzymes such as  
142 *UGT71B1*, *UGT89B1* or *UGT74F2* ([Dempsey et al. 2011](#)) in the *why1* mutant  
143 compared to WT during plant development from 28 to 42 days after germination (dag).  
144 Interestingly, loss-of-*WHY1* increased the transcript level of *PAL1* and *PAL2* at 37 dag,  
145 but greatly decreased the transcript level of *BSMT1* at 35 and 37 dag and of *ICS1* at  
146 42 dag (Figure 1b), while the transcript levels of *UGT71B1*, *UGT74F2*, *UGT89B1* and  
147 *S3H* were not altered in the *why1* mutant during plant development (Supplementary  
148 Fig S1).

149 Thus, we tested whether SA contents also changed in the *why1* mutant during plant  
150 aging. The SA contents including conjugated and free type of SA of the *why1* and WT



151 plants were measured with a HPLC assay during the period from 28 dag to 58 dag of  
152 plant development. Our results indicate that *loss-of-WHY1* made both conjugated SA  
153 and free SA peak 5 days earlier (at 37 dag) than in wild type (Figure 1c-d).

154 In order to genetically confirm this hypothesis, we produced *the why1pal1*, *why1sid2*,  
155 *why1pal1sid2*, *why1bsmt1* double/triple mutants (Supplementary Fig S2) and  
156 measured the SA contents in these mutants during plant aging (Figure 1e).

157 Interestingly, the early SA peak disappeared in the *why1pal1* line at 37dag, showing a  
158 similar SA profile as the wild type, while SA accumulation in *why1* mutants combined  
159 with *bsmt1* mutation were not that strongly affected, displaying the same early  
160 senescent phenotype as the *why1* line. However, SA accumulation in *why1* combined  
161 with *sid2* (*ics1*) was inhibited at 42 dag. The *why1pal1sid2* triple mutant showed a  
162 delay senescence phenotype and had again no earlier SA peak even maintain low  
163 level of SA at 37 and 42 dag during plant development, suggesting that PAL activity is  
164 crucially important for SA accumulation at early stage. Thus, we genetically confirmed  
165 that SA homeostasis in cells is affected by WHY1 predominantly by its effect on PAL1.

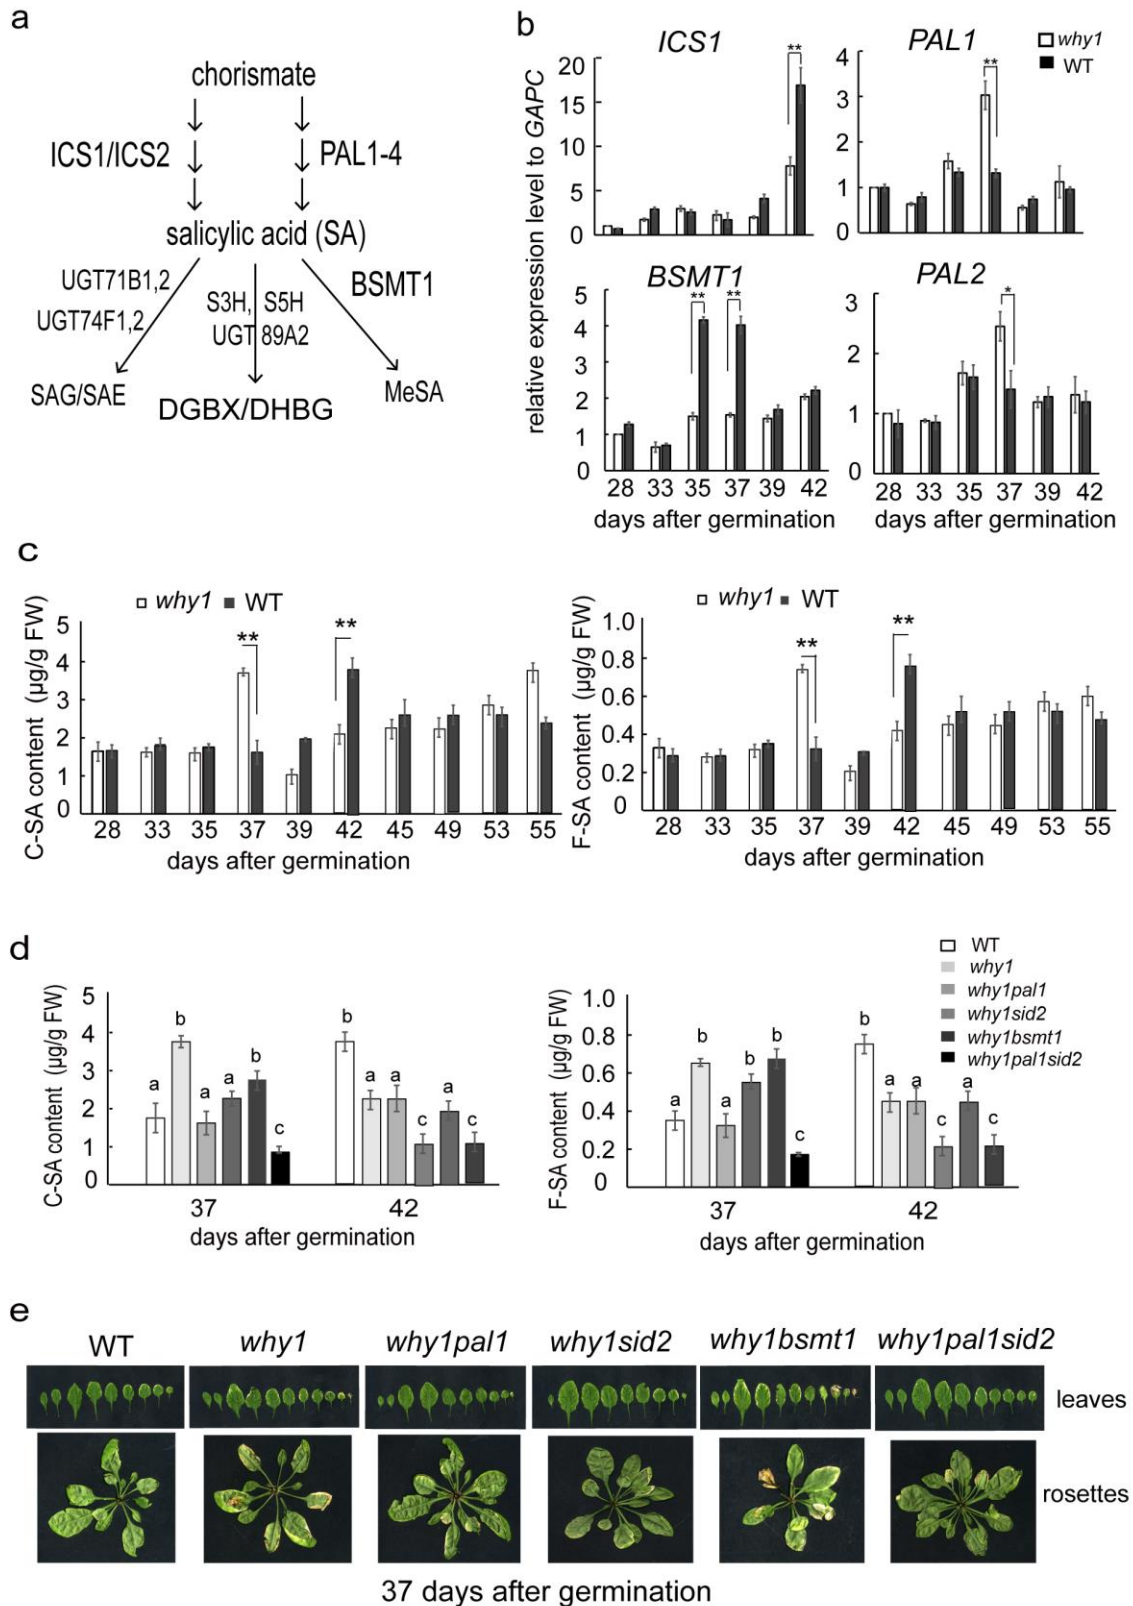

169 a. SA metabolism pathway in the cell. b The variation transcript level of genes  
170 encoding key enzymes related to SA metabolism in the *why1* line during plant  
171 development. c. Content of conjugated (C-SA) and free (F-SA) salicylic acid in wild  
172 type and *why1* mutant during the period of 28 to 55 days after germination (dag); d.  
173 Changes of conjugated and free salicylic acid contents in a series of double mutants  
174 with focus on 37 and 42 dag. f. Senescence phenotype of 37 dag old double mutants.  
175 The relative expression level normalized to *GAPC*, wild type at 28 dag (b) was setup  
176 as 1. The standard error bars present three time biological replicates and three time  
177 techniques replicates, the values are shown as means  $\pm$ SD. Asterisks (\*P < 0.05, \*\*P  
178 < 0.01) show significant differences to wild type line according to either two-way  
179 ANOVA or pair-wise multiple t-tests.

180

181 **nWHY1/pWHY1 affects the gene expression level of *PAL1*, *ICS1* and *BMST1* as well**  
182 **as SA homeostasis during plant aging**

183 As we knew, WHY1 is dual-located in the nucleus and plastids (Grabowski et al. 2008).  
184 To clarify which isoform of WHY1 affects SA metabolism and its homeostasis, we  
185 complemented the *why1* background line with pWHY1, nWHY1 and pnWHY1 under  
186 *35S* promoter control (Lin et al. 2019), and analyzed the transcript levels of *PAL*, *ICS*,  
187 *and BSMT1* from 28 dag to 42 dag. Complementation with nWHY1 or full length  
188 WHY1 (pnWHY1) restored wild type transcript levels of *PAL1*, *PAL2* and *BSMT1*,  
189 while the *nWHY1/why1* line had even lower *PAL1* expression level at 37 dag and 42

190 dag compared to WT. Surprisingly, complementation with pWHY1 not only  
191 pronounced the transcript level of *PAL1* two folds and repressed the transcript level of  
192 *BSMT1* at 37 dag, but also significantly increased the transcript level of *ICS1* at 42  
193 dag, (Figure 2a). Measuring the SA contents in the complemented *why1* mutant  
194 background from 28 to 42 dag, both *nWHY1/why1* and *pnWHY1/why1* lines  
195 significantly restored wild type SA accumulation of the *why1* line until 37 dag and in  
196 the *nWHY1/why1* mutant the SA content was even lower at 42 dag. However, pWHY1  
197 significantly pronounced SA accumulation during the whole period of development  
198 (Figure 2b), indicating that nWHY1 somehow repressed SA accumulation via  
199 suppression of *PAL1* expression. On the other hand, pWHY1 might pronounce SA  
200 accumulation via repressing *BSMT1* during the early stages and promoting *ICS1* at  
201 the late stage, in a developmentally dependent manner.

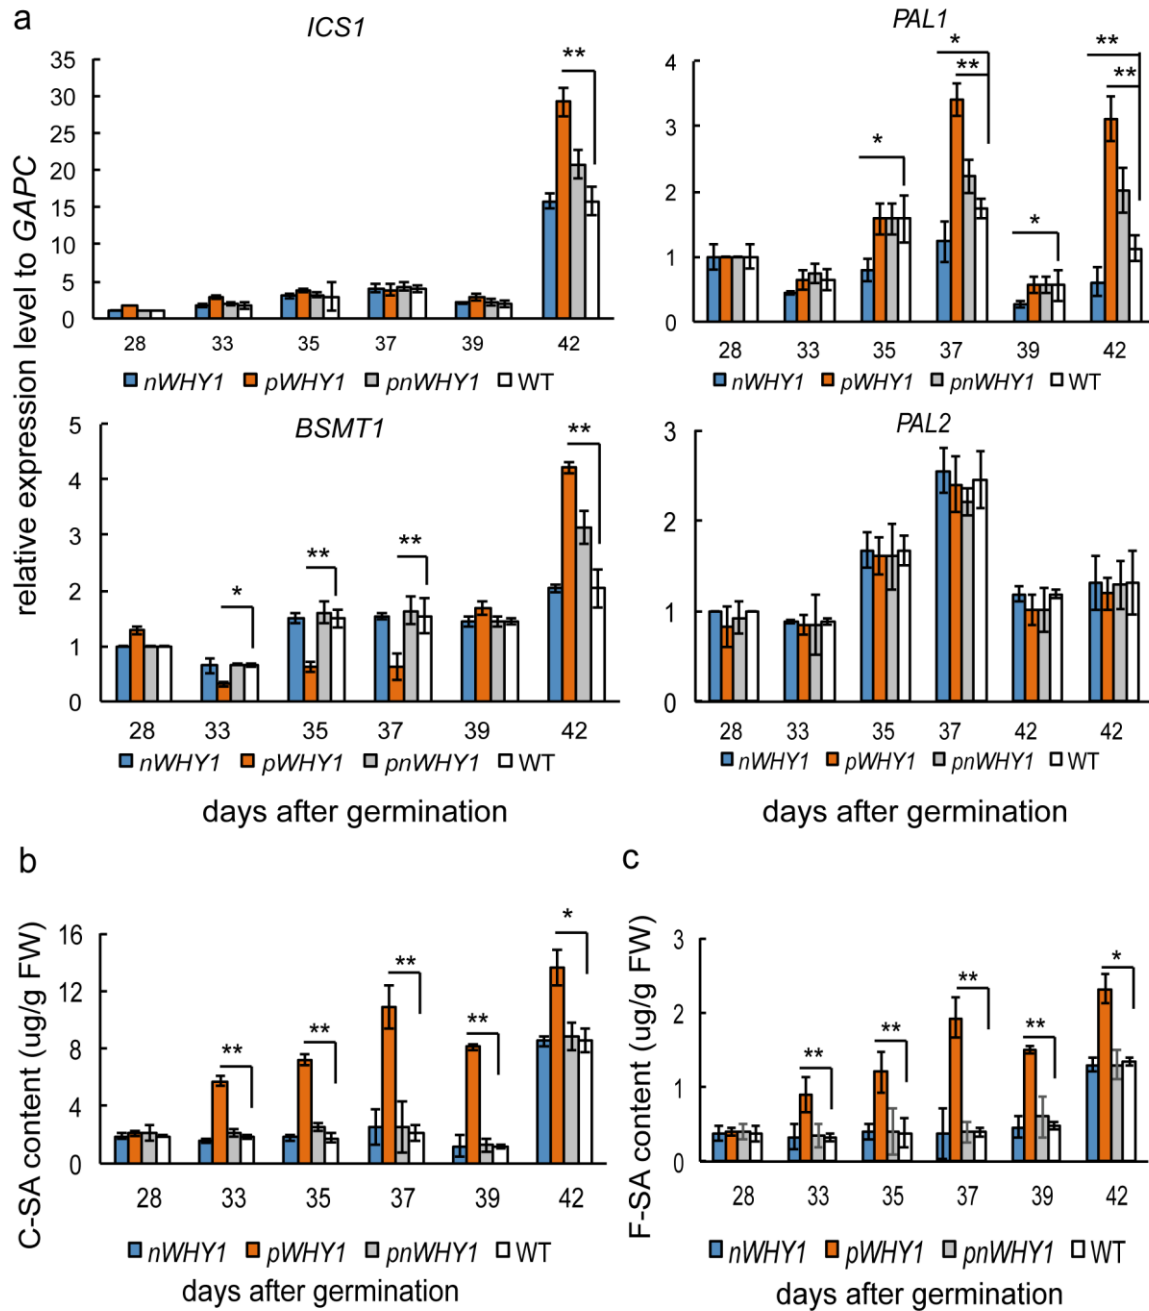

202

203 Figure 2. Transcript level analysis of genes encoding key enzymes related to SA

204 metabolism pathway (a) and SA contents (b) in the *pWHY1/why1*, *nWHY1/why1*, and

205 *pnWHY1/why1* transgenic plants compared to wild type from 28 to 42 dag during plant

206 development.

207 The standard error bars present three time biological replicates, the values are shown

208 as means±SE. Asterisks (\*P < 0.05, \*\*P < 0.01) show significant differences to WT

209 within the respective conditions according to Student's t test.

210

### 211 **Hormone- related gene enrichment in “compartmental WHY1” transgenic plants**

212 In order to globally understand the differences and similarities of the nuclear  
213 transcriptome response between pWHY1 and nWHY1, a microarray sequencing  
214 analysis was deployed. Phenotypic differences were observed in the short term  
215 response and to avoid a long term secondary artifact caused by continuous  
216 expression, an estradiol-inducible promoter was used to generate “inducible  
217 compartmental WHY1” transgenic plants (*VEX:pWHY1/why1* and *VEX:nWHY1/why1*)  
218 as described in Ren et al., (2017). We found that WHY1 protein level increased about  
219 14 folds after two hours induction with 20  $\mu$ M estradiol (Ren et al. 2017). The total  
220 RNA isolated from the 5 week old rosette leaves of inducible *VEX:pWHY1/why1* and  
221 *VEX:nWHY1/why1* plants before (0h) and after estradiol application (2h), as well as  
222 from *why1* and WT plants was used for transcriptome analysis by ATH1 *Arabidopsis*  
223 GeneChip microarrays with two biological replicates. Comparing the transcriptome of  
224 inducible pWHY1 plants to that of non-inducible pWHY1 plants revealed a complex  
225 genetic reprogramming with 1165 and 4560 transcripts being at least 2-fold up- and  
226 down- regulated, respectively. Comparison of inducible nWHY1 plants to that of  
227 non-inducible nWHY1 plants revealed also a complex genetic reprogramming with  
228 920 and 3965 transcripts up- and down- regulated, respectively. Transcriptomic  
229 comparison of the *why1* mutant to WT plants identified 4432 and 1190 transcripts up-

230 and down- regulated, respectively (Supplementary Fig S3).

231 To visualize gene expression reprogramming in the *VEX:pWHY1 VEX:nWHY1* and  
232 the *why1* plants, their entire nuclear transcriptome was subjected to MapMan analysis  
233 allowing the identification of biological processes with significant alterations (Thimm et  
234 al., 2004). The hormone metabolism pathways are significantly overrepresented after  
235 induction of pWHY1, nWHY1, or by loss-of WHY1, affecting especially auxin,  
236 jasmonic acid (JA) and ethylene metabolism, as well as SA metabolism (Figure 3,  
237 Supplemental dataset1-4). The regulation of secondary metabolism and stress are  
238 also significantly enriched after induction of pWHY1 expression (Figure 3a). These  
239 stresses are associated with biotic stresses and abiotic stresses responses that are  
240 related to redox imbalance. They mostly are up-regulated by pWHY1 (Figure 3a). In  
241 contrast the regulation of RNA, development and signaling terms are significantly  
242 enriched after induction of nWHY1 expression. Since the opposite regulation of  
243 signaling, development, RNA and transport terms is observed in loss-of WHY1 plants  
244 (Figure 3a), these changes can be attributed to the inducible expression of pWHY1 or  
245 nWHY1 (Figure 3a). Globally, a net enrichment of biological processes linked to  
246 hormone metabolism is found within the most significantly differential expressed  
247 genes after induction of pWHY1 or nWHY1 or deletion of WHY1 (Figure 3b); a net  
248 enrichment for biological processes linked to hormone metabolism, secondary  
249 metabolism and photosynthetic stress is found within the most differentially expressed  
250 genes in inducible pWHY1 line (Figure 3b), while a net enrichment for biological

251 processes linked to RNA regulation, development or signaling is found within the most  
 252 differentially expressed genes in inducible nWHY1 line (Figure 3b) and a net  
 253 enrichment for biological processes linked to photosynthesis and signaling or  
 254 development or RNA regulation is found within the most differentially expressed  
 255 genes in the *why1* line (Figure 3b).

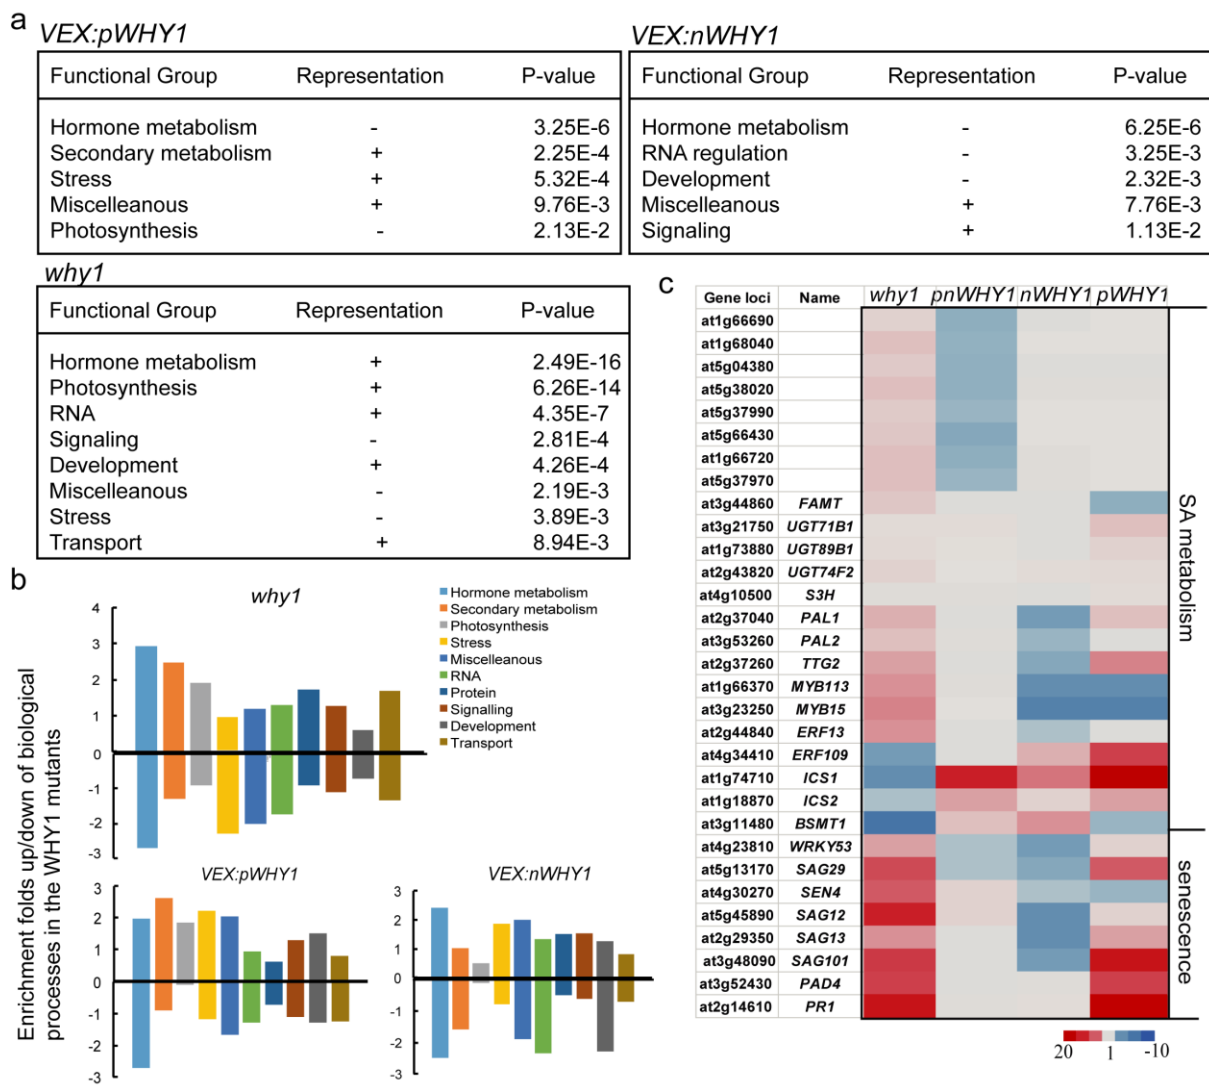

256

257 Figure 3. The *VEX:pWHY1*, *VEX:nWHY1* and the *why1* mutants exhibits a complex  
 258 nuclear genetic reprogramming.

259 a. MapMan analysis for gene ontology terms enrichment of the entire *VEX:pWHY1*,



260 *VEX:nWHY1* and the *why1* nuclear transcriptome.

261 b. Histogram presenting the ratio of differentially expressed genes enrichment  
262 changes of selected biological process of the *VEX:pWHY1*, *VEX:nWHY1* and the  
263 *why1* transcriptome.

264 c. The heatmap of SA metabolism related gene expression levels of the *pWHY1/why1*,  
265 *nWHY1/why1*, *pnWHY1/why1* plants, and the *why1* mutants. *VEX:pWHY1*,  
266 *VEX:pWHY1/why1*; *VEX:nWHY1*, *VEX:nWHY1/why1*

267 Among the differentially expression genes, 153 of differentially expression genes  
268 overlay between inducible pWHY1 and nWHY1 lines. Among them, 42 of  
269 hormone-related gene expressions were up- or down- expression in the pWHY1 or  
270 *why1* lines, including SA, JA, IAA and ethylene metabolism and signaling related  
271 genes (Figure 3, Supplementary dataset1-4). The 24 highest expressed or  
272 suppressed genes in the pWHY1, nWHY1 or the *why1* plants, which encode key  
273 components of the SA metabolism pathway including ICS1, ICS2, PAL1, PAL2,  
274 UGT71B1, UGT89B1, UGT74F2, BSMT1, as well as SA signaling related genes, or  
275 senescence / cell death related genes are shown in the heatmap (Figure 3c).

276 **WHY1 directly binds at the promoter region of *ICS1* and indirectly affects *PAL1***  
277 **and *BSMT1* expression in a developmental dependent manner**

278 WHY1 was first reported as a transcription factor in the nucleus (Marechal et al. 2000).

279 To investigate whether WHY1 directly regulates *ICS1*, *PAL1/PAL2*, *BSMT1* gene

280 expression, we analyzed our previous ChIP-seq dataset and above microarray  
281 dataset, and found that *ICS1*, *MYB15* and *ERF109* are direct targets of WHY1 (Miao  
282 et al. 2013; and Figure 4a), but *PAL1* and *BSMT1* are not. A search for transcription  
283 factor binding motifs in promoter regions of *ICS1*, *MYB15*, *ERF109*, *PAL1*, and  
284 *BSMT1* genes was conducted with PlantCARE (Lescot et al. 2002) and resulted in  
285 two w-boxes, six MYC elements, and four MYB motives in the promoter of *PAL1*;  
286 6xERE elements in the *BSMT1* promoter (Figure 4b) as well as several GTNNNNAAT  
287 and AT-rich motives in the *ICS1*, *MYB15*, and *ERF109* promoters. In order to clarify  
288 the relationship among them, firstly, we confirmed WHY1 binding at the target genes  
289 by chromatin immunoprecipitation qPCR (ChIP-qPCR) using leaf material from 37  
290 and 42 dag of expressing HA-tagged WHY1 under its native promoter  
291 (*P<sub>why1</sub>:WHY1-HA*) as described in previous work (Miao et al. 2013). The putative cis  
292 elements found in *WRKY53*, *ICS1*, *MYB15*, *ERF109*, and *WRKY33* promoters,  
293 included several GTNNNNAAT or AT-rich motives (Figure 4b), and were enriched  
294 5-20 fold (Figure 4c). The regions containing GTNNNNAAT and AT-rich motives of  
295 *MYB15*, *ERF109*, and *WRKY53* were enriched 10-15 folds at 37 dag, while fragments  
296 of *ICS1* and *WRKY33* could not be detected at 37 dag, but together with *MYB15* and  
297 *WRKY53* a high enrichment was observed at 42 dag (Figure 4c). Furthermore, the  
298 expression levels of these genes were analyzed by quantitative reverse transcription  
299 PCR (qRT-PCR) at 37 and 42 dag in *why1* and WT plants. WHY1 binding negatively  
300 correlated with gene expression in the knockout background of *ERF109* at 37 dag and

301 ICS1 at 42 dag and positively with *MYB15* expression at both 37 and 42 dag. While  
 302 *WRKY53* expression is positively correlated in *why1* plants at 37 dag, *WRKY33* was  
 303 up-regulated at 42 dag. Thus, WHY1 appears to exert either negative effects on gene  
 304 expression (*WRKY53*, *WRKY33* and *MYB15*) or causes activation of its target genes,  
 305 such as *ERF109* and *ICS1* depending on the developmental stage.

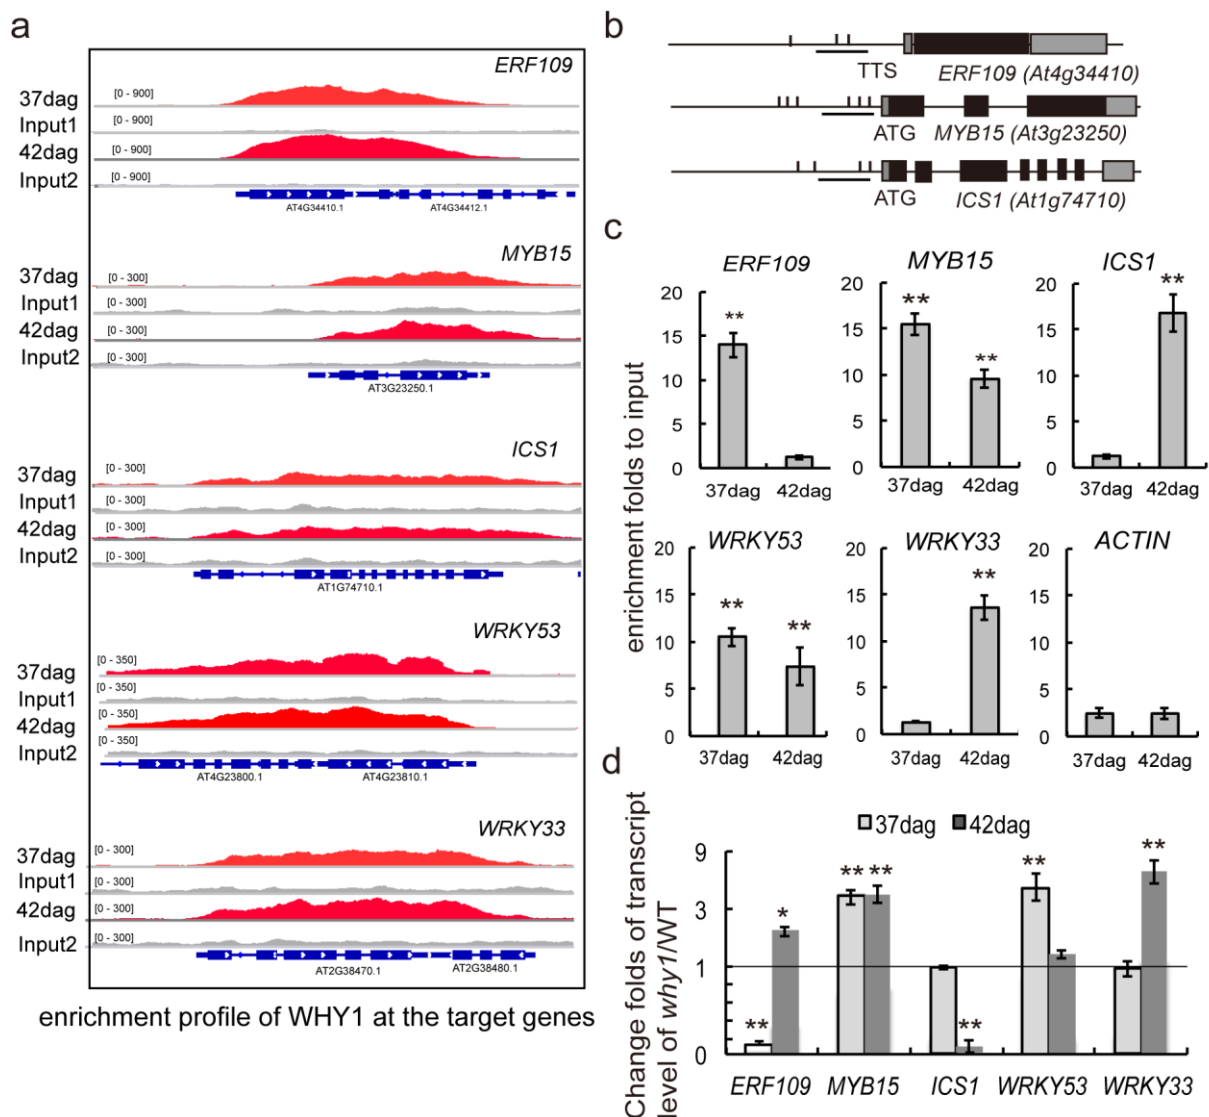

306  
 307 Figure 4. WHY1 activates/represses target gene expression

308 a. Enrichment profiles of WHY1 protein in five target genes: *ERF109*, *MYB15*,  
 309 *WRKY33*, *ICS1*, and *WRKY53* by ChIP-seq; b. Position of promoter motifs

310 (*GTNNNNAAT plus AT-rich*) of WHY1 target genes; c. Enrichment folds of WHY1 at  
311 the promoters of target genes by CHIP-qPCR at 37 and 42 days after germination; d.  
312 The expression levels of target genes at 37 and 42 days after germination in the *why1*  
313 mutant compared to WT. The error bars represented SD from three biological  
314 replicates. Asterisks indicated significant differences from the *ACTIN* according to  
315 two-tail Student's t test (\* denotes  $P < 0.05$ , \*\* for  $P < 0.01$ ).

316

317 In order to further verify the activation or repression activity of WHY1, the promoter  
318 sequences of *WRKY53*, *ICS1*, *MYB15*, *ERF109*, *PAL1* and *BSMT1* were cloned into  
319 dual-luciferase vectors and applied in a transient expression assay using *Nicotiana*  
320 *benthamiana* leaves (Hellens et al., 2005). In addition to measure promoter activation  
321 or repression by WHY1, also MYB15, and ERF109 were included in the analysis to  
322 investigate indirect effects of WHY1 in the nucleus. The coding sequences of WHY1,  
323 MYB15 and ERF109 were cloned under the control of the Arabidopsis *ACTIN1*  
324 promoter (*ACTIN:WHY1-HA*, *ACTIN:MYB15-HA*, and *ACTIN:ERF109-HA*) (Figure  
325 5a), and co-infiltrated with the reporter vector to drive LUCIFERASE (LUC) expression  
326 (Hellens et al., 2005). We then measured the LUC and RENILASE (REN)  
327 luminescence ratio (i.e. LUC/REN ratio) in infiltrated leaves. To assess any basal  
328 activation or repression of putative promoters, a mini-*GAL4* promoter vector was used  
329 in each co-infiltration experiment as a control; the *WRKY53* promoter was used as a  
330 positive control. The results showed that WHY1 activated promoters of *ICS1* and

331 *ERF109*, but it repressed the promoters of *MYB15* and *WRKY53* displaying the  
332 opposite expression pattern of the *why1* knockout plants (Figure 4b). The transcription  
333 factors *MYB15* and *ERF109* were able to activate *PAL1*, *PAL2* and *BSMT1* gene  
334 expression, respectively (Figure 5b-c). Therefore, *WHY1* directly activated *ICS1*  
335 expression and indirectly affected *PAL1*, *PAL2* and *BSMT1* gene expression *via*  
336 *MYB15* and *ERF109*, respectively.

**a**

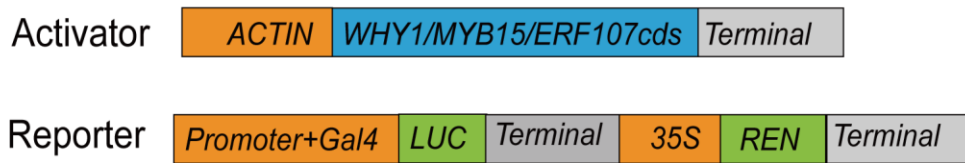

**b**

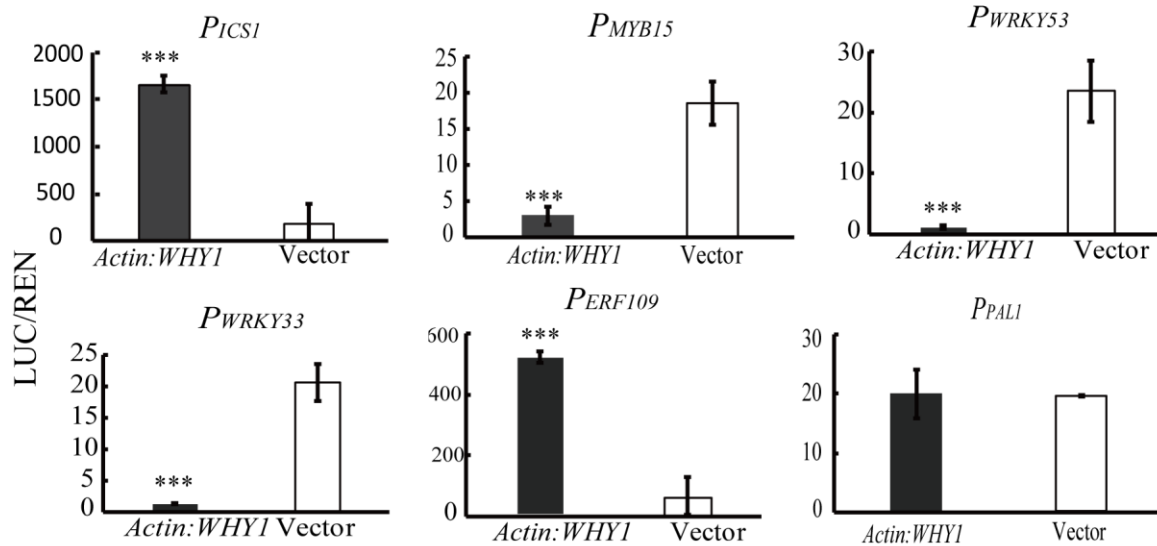

**c**

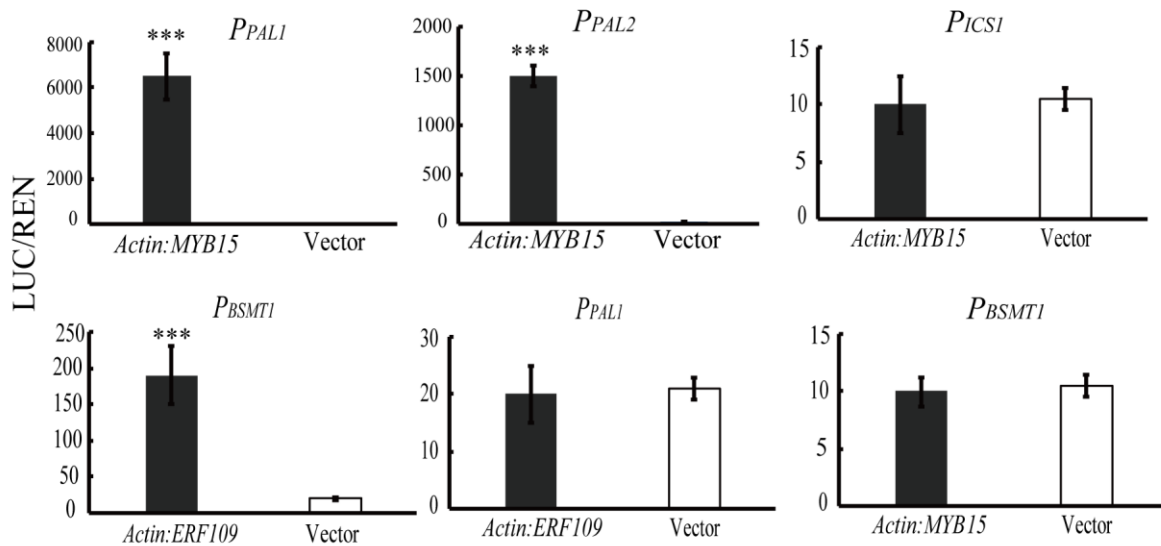

337

338 Figure 5. Promoter activation assays using the LUC/REN system

339 a. Structure of activator and reporter constructs. b. The promoters of *ICS1*, *MYB15*,

340 *ERF109*, *WRKY53*, and *WRKY33* genes are co-infiltrated with a vector containing

341 *WHY1* under the regulation of the *ACTIN* promoter. c, Co-infiltration of *MYB15* and

342 ERF109 with the *PAL1*, *PAL2*, *ICS1*, and *BSMT1* promoters. Background promoter  
343 activity is assayed by co-infiltration with an empty vector of the same type. Shown are  
344 means and SE of six biological replicates. Asterisks denote statistically significant  
345 differences from the empty vector calculated using Student's t test: \*, P, 0.05; \*\*, P,  
346 0.01; and \*\*\*, P, 0.001.

### 347 **WHY1 and MYB15/ERF109 regulate leaf senescence and ROS accumulation**

348 Since WHY1 is a repressor of plant senescence at early stage (35-42 dag) of plant  
349 development (Miao et al. 2013), we compared the phenotype of the *pal1*, *sid2*, *myb15*,  
350 *erf109* mutants (Supplementary Fig S2) with the *why1* mutant to analyze if WHY1  
351 effects on salicylic metabolism impact senescence. The phenotypes of the *pal1* and  
352 *sid2* plants have already been reported to delay senescence, and on the contrary,  
353 *oePAL1*, *oeSID2* and *bsmt1* plants showed an early senescence phenotype (Love et  
354 al., 2008; Rivas-San et al., 2011; Vlot et al., 2009; Huang et al. 2010). We analyzed all  
355 mutants with respect to a visible senescent yellow leaf ratio (Miao and Zentgraf, 2007)  
356 and reactive oxygen species (ROS) production by nitro blue tetrazolium chloride (NBT)  
357 staining assay and diaminobenzidine (DAB) staining assay under normal growth  
358 condition. The results showed that all of *pal1*, *sid2*, *myb15*, and *erf109* lines displayed  
359 a visible delayed senescence and less ROS production except for the *bsmt1* plants,  
360 which showed slightly earlier senescence and higher ROS accumulation similar to the  
361 *why1* and the *pWHY1* lines (Figure 6a-b).

362 Furthermore, the transcript levels of senescence related genes *such as WRKY53*,  
363 *SAG12*, *SAG13*, *SAG101*, and *PAD4* were measured by qRT-PCR and indicated as  
364 heatmap (Figure 6c). They were upregulated in the *why1* and *pWHY1* plants, similar  
365 to the overexpressing *PAL1* (*oePAL1*) plants, however downregulated in the *pal1*,  
366 *myb15*, and *sid2* similar to the *nWHY1* plants (Figure 6c). Interestingly, in the  
367 overexpressing *BSMT1* (*oeBSMT1*) line the transcript level of senescence related  
368 genes *SAG12* and *WRKY53* were upregulated, while the transcript level of *SAG13*  
369 and *SAG101* were downregulated, a reversed expression trend as compared to the  
370 *bsmt1* and *erf109* mutants (Figure 6c). However, the transcript level of *PAD4* was  
371 upregulated in the both *bsmt1* and *oeBSMT1*. This indicates that BSMT1 is involved in  
372 alternative signaling pathways between developmental senescence or stress related  
373 senescence



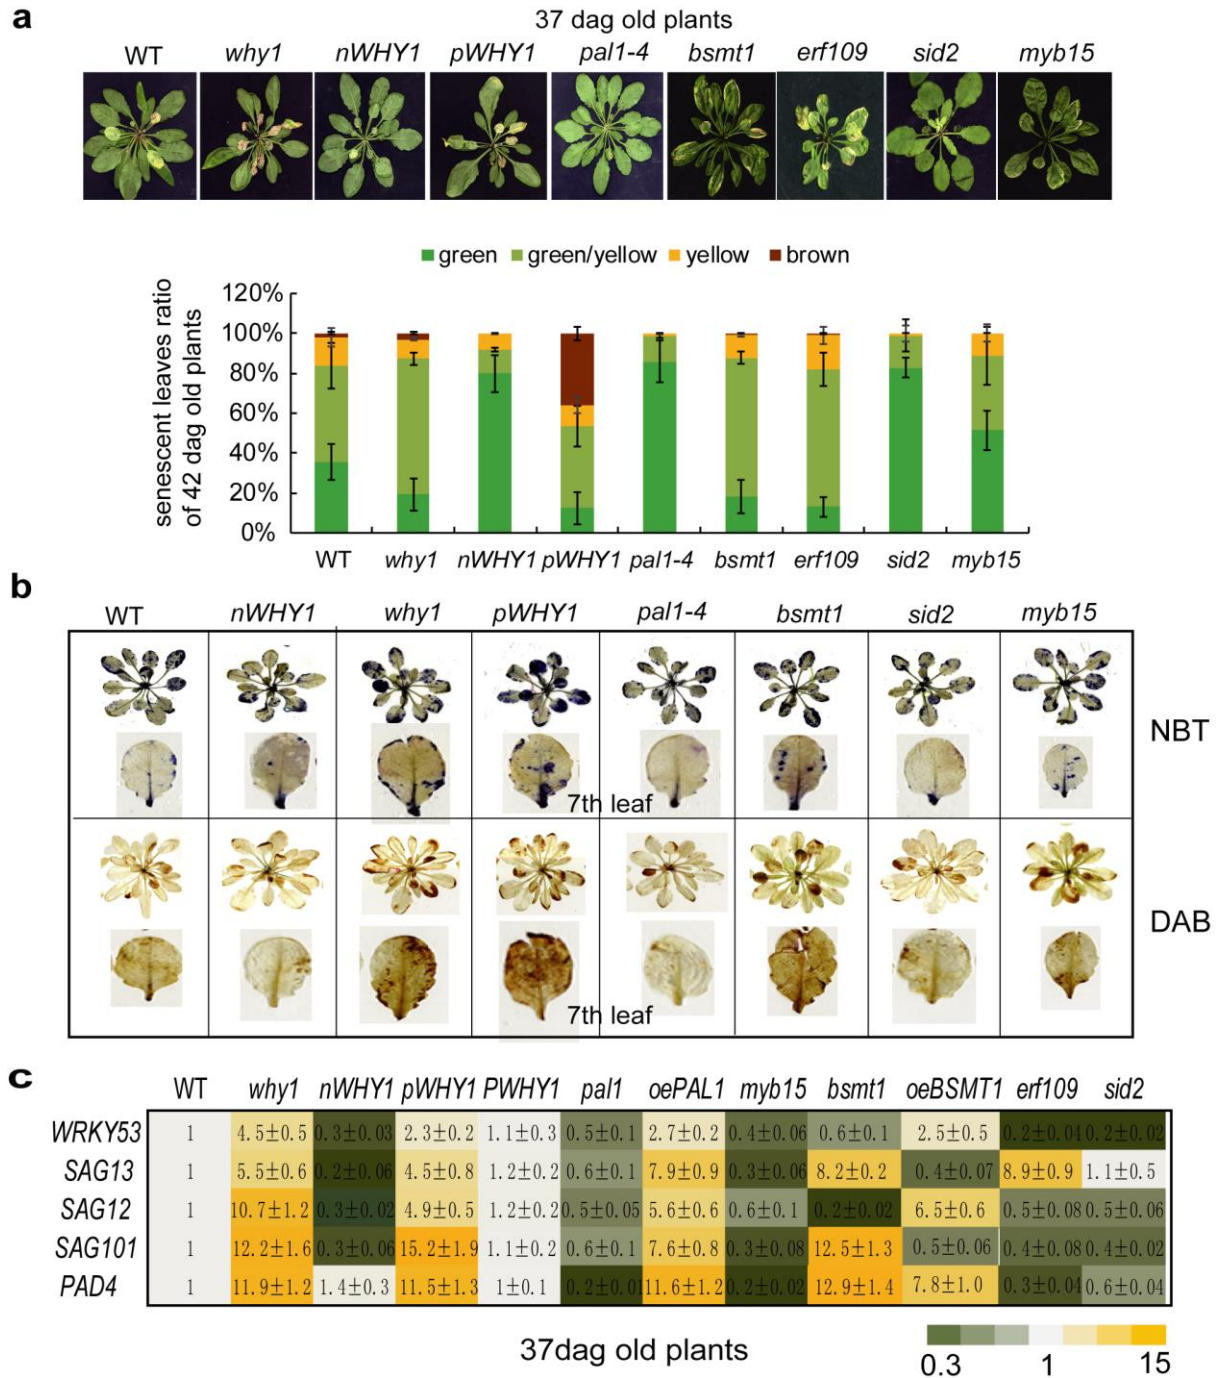

374

375 Figure 6. Phenotyping of loss- of *WHY1* and its downstream target genes mutants

376 a. Phenotypes of loss-of *PAL1*, *ICS1*, *MYB15* and *BSMT1* at 37dag compared to  
377 *WHY1* mutants. Whole rosette (a-up) and senescent leaf ratio of 5 plants (a-down); b.

378 ROS accumulation of loss-of *PAL1*, *ICS1*, *MYB15* and *BSMT1* at 37dag compared to

379 *WHY1* mutants by NBT and DAB staining; c. The transcript levels of SAGs genes in  
380 the loss- or gain- of *PAL1*, *BSMT1* and loss- of *MBY15*, *ERF109* and *ICS1* plants at  
381 37dag by qRT-PCR. The standard error is calculated from three biological replicates,  
382 the values are shown as means±SE. The wild-type at 37 dag was setup to 1 in the  
383 heatmap.

384 **SA level feedback affects the distribution of the WHY1 protein in plastids and**  
385 **the nucleus**

386 WHY1 is required for SA- and pathogen-induced *PR1* expression ([Desveaux et al.](#)  
387 [2005](#)); WHY1 distribution is affected by protein modification (Ren et al. 2017) and  
388 cellular H<sub>2</sub>O<sub>2</sub> level (Lin et al. 2019). To determine whether SA feedback would affect  
389 *WHY1* expression we quantified WHY1 transcription by qRT-PCR in response to  
390 exogenous MeSA in WT plants for 1, 4, 6, and 8 hours. Unexpectedly, MeSA  
391 treatment did not change the gene expression level of *WHY1* (Figure 7a). Thus, MeSA  
392 treatment probably affects WHY1 protein function or distribution in plastids or the  
393 nucleus. Thus, nuclear and plastid proteins isolated from 5-week-old WT rosettes  
394 after MeSA treatment for 4 hours were immunodetected with a specific monoclonal  
395 antibody against WHY1 (Lin et al. 2019; Supplementary Fig S4), and antibodies  
396 against Histone 3 and photosystem II (PSII) protein were used as markers for pure  
397 nuclear and plastid preparations (Figure 7b-c; Supplementary Fig S5). A water  
398 treatment served as control for MeSA application. Interestingly, the results now  
399 indicated that upon MeSA treatment for 4h, WHY1 accumulation significantly

400 decreases in plastids and the nuclear isoform of WHY1 was altered in its status with  
401 small nWHY1 (29 kDa) levels slightly increasing, while large nWHY1 (37 kDa) levels  
402 were decreasing after MeSA treatment (Figure 7b-c). Thus, exogenous MeSA  
403 treatment affects WHY1 accumulation in plastids and alters the modification status of  
404 nWHY1 in the nucleus, a similar response as observed in response to H<sub>2</sub>O<sub>2</sub> treatment  
405 (Lin et al. 2019). Furthermore, we analyzed WHY1 distribution between plastid and  
406 nucleus under the condition of SA deficiency. The nuclear and plastid fractions  
407 isolated from the single *sid2*, *pal1* mutants and double *sid2 pal1* mutant were  
408 subjected to immunoblotting using the WHY1 specific peptide antibody and the results  
409 demonstrate that pWHY1 in the *sid2*, *pal1* and *sid2 pal1* mutants significantly  
410 accumulated in plastids when compared to WT. Accordingly, the large nuclear WHY1  
411 isoforms (37 kDa) were highly accumulating and the small nuclear WHY1 proteins (27  
412 kDa) were declining in the *sid2* and *sid2 pal1* mutants, but not in the *pal1* single  
413 mutant (Figure b-d). This indicates that the ICS1 pathway plays a prominent role in  
414 modification of nWHY1 protein.

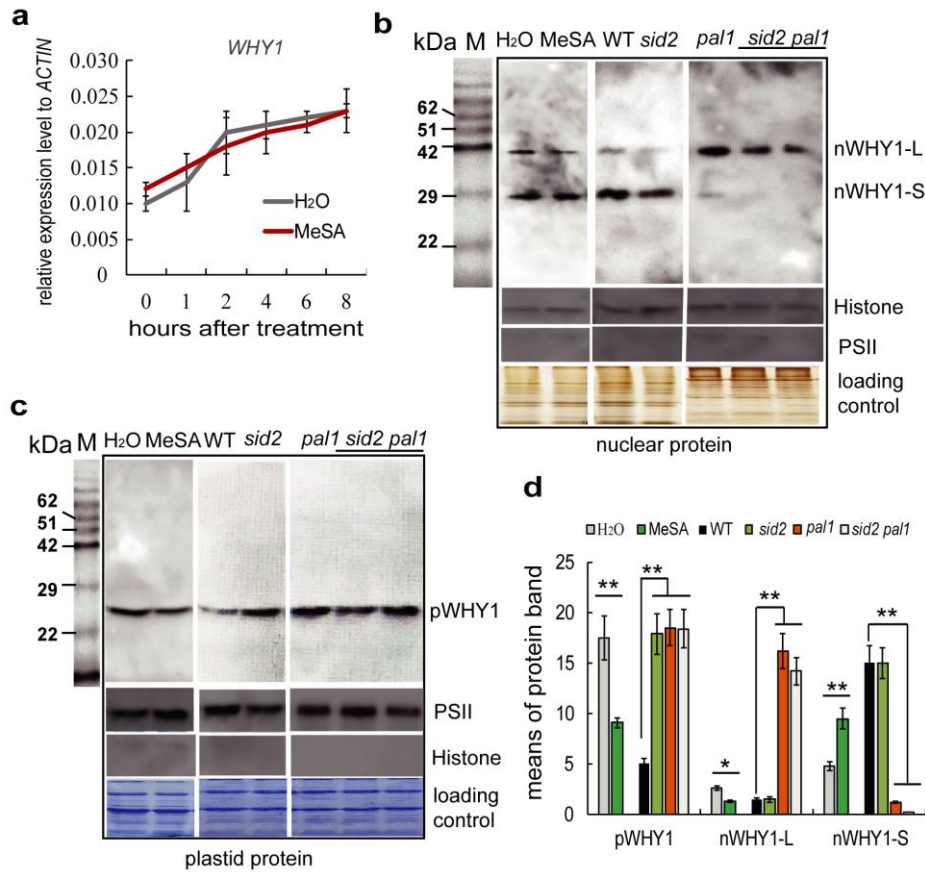

415

416 Figure 7. The plastid and nuclear isoform WHY1 protein immunodetection after the

417 treatment of MeSA and in the *sid2*, *pal1* or double *sid2 pal1* mutants compared to WT

418 a. The expression level of WHY1 in the WT plants after MeSA treatment for 1, 2, 4, 6,

419 8 hrs; b. WHY1 immunodetection in nuclear extracts after the treatment of MeSA for 4

420 hours, and in the *sid2*, *pal1* or double *sid2 pal1* mutants compared to WT; c. WHY1

421 immunodetection in plastid extracts after the treatment of MeSA for 4 hours, and in the

422 *sid2*, *pal1* or double *sid2 pal1* mutants compared to WT. Coomassie and silver

423 staining as the protein amount loading controls. L-WHY1: large size (37 kDa) of

424 WHY1; S-WHY1: small size (29 kDa) of WHY1. The antibody against peptide WHY1

425 was prepared by company; d. The alteration of pWHY1 and nWHY1 after MeSA

426 treatment or in the *sid2*, *pal1* or double *sid2 pal1* mutants compared to WT. The  
427 protein band signal is captured and calculated by Image J software program  
428 (<http://www.di.uq.edu.au/sparqimagejblots>). The data shows the average of three  
429 replicates. Asterisks (\* $P < 0.05$ , \*\* $P < 0.01$ ) show significant differences to H<sub>2</sub>O  
430 treatment or WT according to Student's t test.

#### 431 Discussion

432 It has become increasingly clear that dual location of proteins mediates diverse  
433 intercellular signaling processes, e.g. described for MAP kinase (Bobik et al. 2015;  
434 Chan et al. 2016), CIPK14 (Ren et al. 2017), but also hormone (ABA, SA)  
435 (Koussevitzky et al. 2007; Caplan et al. 2015; Kacprzak et al. 2019), or ROS  
436 (hydrogen peroxidase and singlet oxygen) signaling (Lin et al. 2019; Duan et al. 2019,  
437 Lv et al. 2019). Proteins with dual subcellular localization can affect transcription and  
438 display various functions in intracellular signaling (Lin et al., 2019; Isemer et al., 2012;  
439 Sun et al., 2011; Nevarez et al., 2017; Pesaresi and Kim, 2019; Wu et al., 2019;  
440 Woodson et al., 2011/2013). This study revealed that dual-located WHY1 protein  
441 directly activates *ICS1* expression in the nucleus at the late stage of plant  
442 development, and indirectly controls PAL1 and BSTM1 expression *via* alteration of  
443 *MYB15* and *ERF109* transcription at the early stage, thereby influencing the SA  
444 homeostasis in the cells during plant development. A SA level feedback affects in turn  
445 WHY1 distribution with a shift into the nucleus and preferential accumulation of the  
446 smaller 29 kDa form. This loop of nWHY1 integrating SA homeostasis via PAL1/ICS1

447 and BSMT1 plays a pivotal role in controlling leaf senescence.

448 Elucidation of biosynthesis and catabolism of SA is important for understanding its  
449 biological functions. 10% of SA is synthesized either from L-phenylalanine via the PAL  
450 pathway in the cytoplasm or up to 90% from chorismate via ICS1/SID2  
451 (ISOCHORISMATE SYNTHASE1/SALICYLIC ACID INDUCTION DEFICIENT2) in  
452 chloroplasts, the latter of which is responsible for the bulk of SA produced during  
453 pathogen infection in *Arabidopsis* (Dempsey et al. 2011). Endogenous SA can also  
454 undergo a series of chemical modifications including hydroxylation by salicylate  
455 hydroxylase (Yamamoto et al. 1965; Zhang et al., 2013), glycosylation by  
456 glycosyltransferases (Lim et al. 2002; Dean et al. 2008), methylation by BSMT1 (Park  
457 et al., 2007) and amino acid or sugar conjugation by XXX (Zhang et al., 2007; Bartsch  
458 et al. 2010). The microarray data and qRT-PCR results show that the gene expression  
459 levels of developmental related transcription factors were upregulated, and that of  
460 stress-related gene were downregulated in the *why1* plants (Figure 3; supplementary  
461 dataset 1-4). The expression levels of *ICS1*, *PAL1* and *BSMT1* were altered  
462 significantly in the *why1* mutant during plant aging (Figure 1); this alteration can be  
463 rescued completely by complementation of nWHY1 and pnWHY1 (Figure 2). As we  
464 knew, nWHY1 could directly bind to the promoters of many targeted genes such as  
465 *WRKY53*, *S40*, *Kenisin*, *PR10a* (Desveaux et al. 2005; Miao et al. 2013; Krupinska et  
466 al. 2017; Xiong et al. 2009), as well as *MYB15*, *MYC1/2*, *ICS1* and several ERF family  
467 members from our WHY1 ChIP-seq dataset (Figure 4; Miao et al., 2013). The nWHY1

468 represses most of downstream developmental related target gene expression such as  
469 *WRKY53*, *WRKY33*, *MYB15*, *TTG2* etc. (Figure 3; Supplementary dataset). However,  
470 it can also promote expression of many stress-related genes such as *HvS40*  
471 (Krupinska et al. 2013), *PR1* (Desveaux et al. 2005), redox responsive transcription  
472 factors (Foyer et al. 2014), *ICS1*, and *ERF109* (Figure 5; Figure 3; Supplementary  
473 dataset). Several MYB family members can bind to the promoter of *PAL1/PAL2* (Battal  
474 et al. 2019), and among these, MYB15 was shown to bind to the promoter of *PAL1*  
475 and *ICE1* promoter by CHIP-qPCR. MYB15 mainly plays a virtual role in immunity and  
476 cold response (Chezem et al. 2017; Kim et al. 2017; Wang et al. 2019). Our results  
477 further confirmed that MYB15 could activate *PAL1* expression. ERF-binding cis  
478 elements are enriched in the promoter region of *BSMT1*. However, *ERF109* as a  
479 target gene of WHY1, which was identified in our CHIP-seq dataset (Miao et al. 2013;  
480 Figure 4), was reported not to bind to the promoter region of *BSMT1* as shown in  
481 yeast one hybrid and gel shift assays (Ximiao Shi, Master thesis, 2018). In contrast,  
482 ERF109 can activate *BSMT1* expression in our LUC/REN transit assay (Figure 5),  
483 supporting our CHIP-seq data. The *erf109* and *bsmt1* mutants accumulate high levels  
484 of anthocyanin in response to high light (Foy et al. 2015), but the regulatory  
485 mechanism is currently unknown. Therefore, the balance module of  
486 nWHY1/MYB15-PAL1 and nWHY1/ERF109-BSMT1 at early stage (37 dag) and  
487 WHY1/ICS1 regulation at late stage (42 dag) determines SA homeostasis during plant  
488 development. The imbalance of PAL1/BSMT1 activity at 37 dag in the *why1* mutant

489 and repression of ICS1 at 42 dag of plant development may result in earlier SA  
490 accumulation for about one week. Thus, nWHY1 impacts the SA homeostasis *via*  
491 mediating PAL1 or ICS1 and BSMT1 activity in the cells during plant aging.

492 The WHIRLY family is considered to associate with retrograde signaling. Due to their  
493 dual-location and function in the nucleus and plastids (Krause et al., 2009), it has  
494 been supposed that WHIRLY1 could move from plastid to the nucleus (Isemer et al.,  
495 2012). The plastid isoform of WHIRLY1 affects the *miRNA* biogenesis in the nucleus  
496 (Swida-Barteczka et al. 2018). Previously, we showed that the WHY1 protein can be  
497 phosphorylated by CIPK14 kinase or oxidized by H<sub>2</sub>O<sub>2</sub>, leading to different subcellular  
498 localization in the nucleus or in plastids, respectively ([Ren et al. 2017](#); [Lin et al. 2019](#)).

499 Here, we show that loss- of WHY1 results in five days earlier SA production during  
500 plant development, thereby accelerating plant senescence. Complementation with  
501 pWHY1, did not revert the SA accumulation phenotype. On the contrary, the pWHY1  
502 further increased SA accumulation during plant development. Consistently, gene  
503 expression of *PAL1* is promoted, while that of *BSMT1* is repressed at 37 dag, while  
504 ICS1 is activated at 42 dag (Figure 1). This phenomenon can be explained by two  
505 mechanisms: 1) H<sub>2</sub>O<sub>2</sub> is known to affect SA levels via the ICS1 pathway (Leon et al.  
506 1995; Dat et al. 1998; Chaouch et al. 2010; Guo et al. 2017) and recent data link  
507 pWHY1 to ROS production *via* photosystem I/II (PSI/PSII) (Huang et al. 2017; Lin et al.  
508 2019). Thus, pWHY1 might increase SA level at 42 dag by modulation of the ICS1  
509 pathway via photosystem induced ROS accumulation to cause an early senescent



510 phenotype. 2) pWHY1 coordinating SA homeostasis is feedback controlled by cellular  
511 SA levels (([Desveaux et al. 2005](#); Isemer et al. 2012; Caplan et al. 2017), so this  
512 WHY1 isoform changes from plastid to nucleus repressing *MYB15* and *PAL1*  
513 expression (Huang et al. 2010; Duan et al., 2019) and activating *ERF109* and *BSMT1*  
514 expression in response to stress cues such as high light (Estavillo et al. 2011). This  
515 demonstrates that dual located pWHY1/nWHY1 affects SA homeostasis most likely  
516 *via* connection with PSI/II mediated ROS affecting leaf senescence.

517 The distribution of WHY1 between plastids and the nucleus depends not only on its  
518 modification status ([Ren et al. 2017](#)) but also on environmental cues or cellular signals  
519 such as H<sub>2</sub>O<sub>2</sub> (Lin et al. 2019) and SA (this work). Though, the SA signal cannot  
520 promote CIPK14 expression (unpublished data), MeSA treatment feedback alters the  
521 nWHY1 protein status (37 kDa or 29 kDa form) (Figure 7) similar to barley WHY1  
522 (Grabowski et al. 2008) and nWHY1 after treatment with H<sub>2</sub>O<sub>2</sub> in *Arabidopsis* (Lin et al.  
523 2019). The nature of modification resulting in both forms is yet unknown and has to be  
524 revealed in future. More interestingly, MeSA treatment reduced WHY1 accumulation  
525 in plastids, which stands in contrast to H<sub>2</sub>O<sub>2</sub> treatment (Lin et al. 2019). These  
526 phenomena are further elucidated in the SA deficient mutants such as *pal1*, *sid2* and  
527 double *pal1 sid2* mutants. Loss-of ICS1 (*sid2*) decreases the modified state of  
528 nWHY1 level, while loss-of ICS1 or PAL1 increases WHY1 accumulation in plastids. It  
529 is known that ICS1 is located in plastids and is responsible for the bulk production of  
530 SA in response to salt or pathogens (Kumazaki and Suzuki, 2019). Plastid-derived SA

531 can be transported from plastid to the nucleus *via* stromule (Caplan et al. 2015). It is  
532 speculated that this kind of SA might influence the nuclear isoform of WHY1, which  
533 small form (29 kDa) activates the stress related gene expression, such as *S40*, *ICS1*  
534 (Krupinska et al., 2013; Figure 4-5), while the large form (37 kDa) represses gene  
535 expression, as shown for *WRKY53*, *WRKY33*, *MYB15* (Miao et al. 2013; Figure 4-5).  
536 Furthermore, it has been reported that phosphorylation of WHY1 by CIPK14 promoted  
537 its binding affinity at the promoter of *WRKY53* and *WRKY33* and repressed *WRKY53*  
538 and *WRKY33* expression (Ren et al. 2017) and that CIPK kinase expression level  
539 rapidly increased in response to salt or pathogen, accompanying increasing  $Ca^{2+}$ ,  
540  $H_2O_2$  and SA levels in the cells (Sardar et al., 2017).

#### 541 Conclusion

542 We conclude that WHY1 exerts dual functions in plastids and the nucleus. Nuclear  
543 WHY1 maintains SA homeostasis by directly affecting *ICS1* and indirectly affecting  
544 *PAL1* and *BSTM1* expression via *MYB15* and *ERF109*. The pWHY1 isoform promotes  
545 *PAL1/ICS1* expression and represses *BSMT1* facilitating high SA accumulation,  
546 resulting in early senescence, similar to *bsmt1* mutants. Interestingly, MeSA treatment  
547 altered the nWHY1 status (increasing the 29 kDa form of WHY1, while decreasing the  
548 37 kDa form), going along with declined pWHY1 accumulation. These results indicate  
549 that pWHY1/nWHY1 distribution in the nucleus and chloroplast allows balancing SA  
550 and  $H_2O_2$  homeostasis, in a developmental dependent manner, thereby affecting leaf  
551 senescence in *Arabidopsis* (Figure 8).

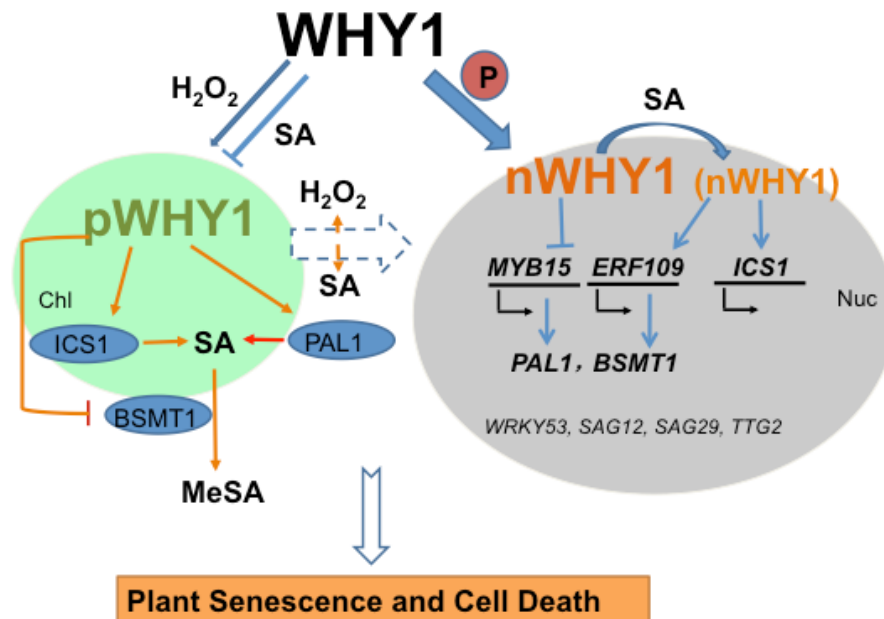

552

553 Figure 8. A working model of the senescence pathway performed by the dual located

554 WHY1 in response to SA. The nuclear isoforms of WHY1 are represented as both a

555 large molecular mass (37 kDa, bigger letters in the Figure) and a small molecular

556 mass (29 kDa, smaller letters). WHY1 has dual functions in plastids and the nucleus.

557 Loss of WHY1 increases SA accumulation at early stage (37 dag) through increasing

558 PAL1 expression and repressing BSMT1; Elevated SA promotes nuclear WHY1

559 de-modification and promotes ICS1 and BSMT1 expression thereby balancing SA

560 homeostasis in the cells. High SA levels by ICS1 cause feedback enhancing ROS

561 accumulation, promoting senescence. pWHY1 stimulates PAL1/ICS1 expression but

562 represses BSMT1, allowing high levels of SA, leading also to early senescence. Thus,

563 distribution of WHY1 organelle isoforms and the putative feedback of SA form a

564 circularly integrated regulatory network during plant senescence in a developmental

565 dependent manner. Plastid (Chl) is shown as a green ovary, nucleus (Nuc) as a grey

566 ovary, lines for regulation, fat arrows for transfer or translocation, broken lines for  
567 uncertainty.

## 568 Materials and Methods

### 569 Plant materials

570 All *Arabidopsis thaliana* mutants are in Col-0 background. The T-DNA insertion  
571 lines *why1* (Salk\_023713), *sid2*, *pal1*, *bsmt1* (SAIL\_776\_B10), *myb15* (*myb15-1*  
572 SALK\_151976, *myb15-2* SK2722) were kindly provided by other scientists; The  
573 *erf109* (SALK\_150614) and over-expression lines of ERF109 gene (CS2102255)  
574 were obtained from the Nottingham Arabidopsis stock center (NASC). Homozygous  
575 plants were selected and confirmed by PCR or RT-PCR using gDNA and mRNA as  
576 templates (Supplementary Fig S2), respectively ([http://signal.salk.edu/](http://signal.salk.edu/tdnaprimers.2.html)  
577 [tdnaprimers.2.html](http://signal.salk.edu/tdnaprimers.2.html)). The overexpressing *nWHY1-HA* lines that produce the WHY1  
578 protein located only in the nucleus, the overexpressing *pnWHY1-HA* lined that  
579 produce the WHY1 protein dually located in plastids and the nucleus, the complement  
580 *PWHY1-HA* (*Pwhy1:pnWHY1-HA*) line, and the *pWHY1-HA* lines that harbor the  
581 construct of the full length WHY1 plus nuclear export peptide sequence fused to  
582 HA-tag produces WHY1 protein located only in plastids have been constructed in our  
583 lab (Miao et al. 2013; Lin et al. 2019).

584 Seeds are germinated on wet filter paper followed by vernalization at 4°C for 2 d,  
585 then transplanted to vermiculite and are grown in a climatic chamber (100  $\mu$ E/h, 13h  
586 of light at 22°C/11h of dark at 18°C, 60% relative humidity). The rosette leaves are

587 labeled with colored threads after emergence, as described previously ([Hinderhofer](#)  
588 [and Zentgraf 2001](#)).

589 For MeSA treatment, rosette leaves are collected at 1, 2, 4, 6, and 8 hours after  
590 spraying with 100  $\mu$ M MeSA and stored in liquid nitrogen or -80 °C for later use in RNA  
591 or protein isolations. Mock treatments used distilled water instead.

#### 592 Measurement SA contents in rosette leaves

593 SA was extracted from 0.2 g the 5<sup>th</sup> leaf from individual plants at different stages of  
594 development and measured by reversed-phase high-performance liquid  
595 chromatography (HPLC) on an Agilent1260 system with a C18 column as previously  
596 described ([Verberne et al. 2002](#)) with small modifications: SA was thoroughly  
597 separated from the complex mixture by methanol containing 10% of sodium acetate  
598 with pH 6.0 (Lin et al. 2017). Fluorescence detection (excitation at 305 nm and  
599 emission at 407 nm) was applied and 3-Hydroxybenzoic acid (3-HBA) was used as an  
600 internal standard ([Aboul-Soud et al. 2004](#)). Conjugated and free SA was detected at  
601 the same time. Three independent biological replicates were performed for each data  
602 point.

#### 603 Staining of ROS

604 Visualization of H<sub>2</sub>O<sub>2</sub> accumulation in leaves was performed using the  
605 3',3'-diaininobenzidine (DAB) staining method according to Zhang et al. (2014) and  
606 Huang et al. (2019). Detached rosette leaves were vacuum filtered in 20 mL staining  
607 solution containing 1 mg/mL DAB in 50 mM Tris-HCl, pH 5.0 for 10 min, and incubated

608 in the darkness at room temperature for 12 h. The leaves were destained by boiling in  
609 a mixture of ethanol, glycerol and acetic acid (3/1/1, v/v/v) for 15 min before imaging.

610 Detection of superoxide free radicals were performed by the nitroblue tetrazolium  
611 (NBT) staining method as described in Lee et al. (2002). The whole rosette leaves of  
612 5- to 6-week-old plants were harvested and immersed in 0.1 mg ml<sup>-1</sup> NBT solution (25  
613 mM HEPES, pH7.6). After vacuum infiltration, samples were incubated at 25°C for 2 h  
614 in the darkness. Subsequently stained samples were bleached in 70% ethanol and  
615 incubated further for 24 h at 25°C to remove the chlorophyll.

616 Imaging was conducted using an Epson Perfection V600 Photo scanner (Epson  
617 China, Beijing, China).

#### 618 Quantitative real-time PCR analysis (qRT-PCR)

619 The qRT-PCR was performed using SYBR Green master mix (SABiosciences,  
620 Frederick, MD, USA) according to the manufacturer's instructions. Complementary  
621 DNA synthesis was carried out using a Fermentas first-strand complementary DNA  
622 synthesis kit (Thermo Fisher Scientific, Waltham, MA, USA) on RNA from  
623 28-55-day-old plants grown under normal light conditions. Complementary DNAs  
624 were diluted 20-fold prior to quantitative PCR experiments. The Touch 1000 platform  
625 (Bio-Rad) was used for qRT-PCR experiments, and the data were analyzed using  
626 Bio-Rad software version 1.5. We used *GAPC2* or *ACTIN* as internal reference genes  
627 for calculation of relative expression. Primers are listed in Supplemental Table S1. All

628 determinations were conducted in three biological replicates.

#### 629 Isolation and detection of plastid and nuclear proteins

630 Chloroplasts and nuclei were prepared and purified as described previously (Ren et al.  
631 2017). Approximately 10 microgram proteins of each fraction was separated on 14%  
632 (w/v) polyacrylamide gels. After transfer to nitrocellulose membranes,  
633 immunodetection followed using specific antibodies against the WHY1 C-terminal  
634 peptide CASPNYGGDYEWNR (Faan, Hangzhou, China). To monitor the purity of the  
635 chloroplast and nuclear fractions, we used antibodies against the cytochrome b559  
636 apoprotein A or the histone H3 (Cell Signaling, Munich, Germany), respectively (Lin et  
637 al. 2019).

#### 638 ChIP-qPCR assay

639 Four-week-old rosettes of transgenic plants expressing the *Pwhy1:WHY1-HA* to  
640 complement the *why1* knockout background were used for sample preparations. The  
641 cross-linked DNA fragments ranging from 200 to 1000 bp in length were  
642 immunoprecipitated by an antibody against the HA-tag (Cell Signaling, Munich,  
643 Germany). The enrichments of the selected promoter regions of both genes were  
644 resolved by comparing the amounts in the precipitated and non-precipitated (input)  
645 DNA samples, which were quantified by quantitative PCR using designed  
646 region-specific primers (Supplementary Table S1 and Figure 4). Material from the  
647 *why1* mutant served as a mock control and was used for normalizations to calculate  
648 the fold enrichment. The experiments were performed three times biological

649 replicates.

## 650 Cloning and Construction of Vectors

651 The promoter sequences of 2kb upstream of ATG of *MYB15* and the *ERF109*,  
652 *WRKY53*, *PAL1*, *PAL2*, *ICS1*, and *WRKY33* genomic sequence were PCR-amplified  
653 and then restricted with *KpnI* and *XhoI*, or *XhoI* and *PstI* respectively and sub-cloned  
654 into the pFLAP vector The entire cassette was then excised with *KpnI* and *AscI* and  
655 cloned into the binary vector pBIN +.

656 For dual Luciferase assays, promoter sequences were PCR-amplified, digested with  
657 *NcoI* and *KpnI* and cloned into the pGreenII 0800-LUC binary vector (provided by  
658 Roger P. Hellens). DNA constructs used for *N. benthamiana* agro-infiltration and for  
659 agrobacteria-mediated plant transformation were constructed with the Goldenbraid  
660 cloning (Sarrion Perdignes et al., 2013).

661 *MYB15*, *ERF109* and *WHY1* coding sequences were subcloned into a pUPD vector.

662 In the dual Luciferase assays; *MYB15*, *ERF109*, and *WHY1* were in the 1 $\alpha$ 1 vectors  
663 which are based on a pGREENII backbone. For generating the genes overexpression  
664 construct, a CDS fragment was amplified subcloned into pGEM-T Easy (Promega),  
665 excised with *BamHI* and *SalI* restriction enzymes and cloned under the CaMV-35S  
666 promoter into pFLAP, before restriction with *PacI* and *AscI* and ligation to the pBIN+  
667 binary vector.

## 668 Dual-luciferase activity assay

669 *Nicotiana benthamiana* plants were grown in climate rooms (22°C, 16/8 h of



670 light/dark). Plants were grown until they had six leaves and then infiltrated with  
671 *Agrobacterium tumefaciens* GV3101. Plants were maintained in the climate rooms  
672 and, after 4 to 5 d, 1-cm discs were collected from the fourth and fifth leaves of each  
673 plant. Six biological replicates with their respective negative controls were used per  
674 assay. The experiment was performed as previously described (Hellens et al., 2005)  
675 with minor changes. *Agrobacterium* was grown over night in LB and brought to a final  
676 O.D.600 0.2 in infiltration buffer. Co-infiltrated *Agrobacterium* carried separate  
677 plasmids; 900  $\mu$ l of an empty cassette or one that contains the transcription factor  
678 driven by the tomato 2 kb UBQ10 (SOLYC7G064130) promoter region, and 100  $\mu$ l of  
679 the reporter cassette carrying one of the test promoters. Leaf discs were  
680 homogenized in 300  $\mu$ l of a passive lysis buffer. 25  $\mu$ l of a 1/100 dilution of the crude  
681 extract was assayed in 125  $\mu$ l of Luciferase assay buffer, and LUC and REN  
682 chemiluminescence of each sample was measured in separate wells on the same  
683 plate. RLU were measured in a Turner 20/20 luminometer, with a 5 seconds delay and  
684 15 seconds measurement. Raw data was collected and the LUC/REN ratio was  
685 calculated for each sample. Biological samples were pooled together and a student's  
686 t-test was performed against a background control for each experiment as described  
687 in the results section. The entire experiment was repeated a second time under  
688 similar conditions to confirm the regulatory effect of transcription factors.

#### 689 Microarray Analysis

690 Two biological replicates were sampled from leaves of wild-type, *VEX:pWHY1/why1*,

691 *VEX: nWHY1/why1*, and the *why1* plants (see our previous paper Ren et al. 2017).  
692 Extracted RNA was then amplified and labeled using the standard Affymetrix protocol  
693 and hybridized to Affymetrix ATH1 GeneChips according to the manufacturer's  
694 guidelines (Katari et al. 2010). Statistical analysis of transcriptome data was carried  
695 out using Parke Genome Suite software ([www.partek.com](http://www.partek.com)). Data preprocessing and  
696 normalization were performed using the Robust Microarray Averaging algorithm  
697 (Irizarry et al., 2003). Batch effects between the replicates were not found.  
698 Differentially expressed genes were identified by using ANOVA according to false  
699 discovery rate, p-value 0.05 and at least a 2-fold change between the genotypes  
700 (Supplementary Dataset 1-4).

#### 701 Statistical analysis

702 Quantitative data were determined by at least three biological replicates and the  
703 statistical significance was analyzed either using two-way ANOVA or pair-wide  
704 multiple t-tests, with the GraphPad Prism software (version 7).

#### 705 Acknowledgments

706 We acknowledge Dr. Hongwei Guo (University of Southern Technology) for providing  
707 the *sid2*, Dr. Zhixiang Chen (Purdue University) for providing the *pal1-4* seeds, Dr.  
708 Nicola Clay (Yale University) for providing the seed of *oeMYB15* and the *myb15*, Dr.  
709 Daniel Klessig (University of California, Berkeley) for providing the *bsmt1* seeds. We  
710 acknowledge the European Arabidopsis Stock Centre providing series of Arabidopsis  
711 mutant seeds (*oe:ERF109* and *erf109* lines). This work is supported by a grant from

712 the Natural Science Foundation of China (NSFC, No. 31770318, 31470383), and by a  
713 grant from Fujian Provincial NSF (No. 2016J01103), and by a grant of international  
714 exchange program of Fujian Agriculture and Forestry University (KXB16009A).

#### 715 Author contributions

716 Y.M. designed the study. W.F.L. performed SA measurements, western blots,  
717 phenotyping, and qRT-PCR. D.H. performed ChIP-seq, ChIP-qPCR. H.Z. performed  
718 plasmid constructs and promoter activation activity and the mutants screening. B.H.W  
719 performed microarray data analyses. W.F.L. and Y.M. analyzed the data. Y.M. and D.S.  
720 wrote the paper. D.C. critically read the paper.

#### 721 Competing interests

722 The authors declare no competing interests.

#### 723 Supporting information:

724 Supplementary Fig S1 Transcript levels of *ICS2*, *UGT71B1*, *UGT89B1*, *UGT74F2* and  
725 *S3H* in the *why1* mutant compared to WT during plant aging

726 Supplementary Fig S2 Verification of mutant plants used in this study..

727 Supplementary Fig S3 Venn analysis of transcriptome of nWHY1, pWHY1, pnWHY1  
728 and *why1*

729 Supplementary Fig S4 Antibody specificity test.

730 Supplementary Fig S5 Western blot detection to certify purity of nuclear protein and  
731 plastid protein extracts.

- 732 Supplementary Table S1. The list of primer sequences for PCR in this study
- 733 Supplementary dataset 1-4
- 734
- 735 References
- 736 Aboul-Soud MAM, Cook K, Loake GJ (2004) Measurement of Salicylic Acid by a  
737 High-Performance Liquid Chromatography Procedure Based on Ion-Exchange.  
738 Chromatographia 59: 129-133
- 739 Alonso-Ramírez A, Rodríguez D, Reyes D, Jiménez JA, Nicolás G, López-Climent M,  
740 Gómez-Cadenas A, Nicolás C (2009) Evidence for a role of gibberellins in salicylic  
741 acid-modulated early plant responses to abiotic stress in Arabidopsis seeds. Plant  
742 Physiol. 150(3):1335-44.
- 743 An C, Mou Z (2011) Salicylic acid and its function in plant immunity. J Integr Plant Biol  
744 53: 412-428
- 745 Bartsch M, Bednarek P, Vivancos PD, Schneider B, von Roepenack-Lahaye E, Foyer  
746 C, Kombrink E, Scheel D (2010) Accumulation of isochorismate-derived  
747 2,3-dihydroxybenzoic 3-O-beta-D-xyloside in arabidopsis resistance to pathogens  
748 and ageing of leaves. J Biol Chem 285(33):25654–25665.
- 749 Battat M, Eitan A, Rogachev I, Hanhineva K, Fernie A, Tohge T, Beekwilder J, and  
750 Aharoni A (2019) A MYB Triad Controls Primary and Phenylpropanoid Metabolites  
751 for Pollen Coat Patterning. Plant Physiol, 180, 87–108,
- 752 Bobik K, and Burch-Smith T (2015) Chloroplast signaling within, between and beyond

753 cells. *Front. Plant Sci.* 6:781

754 Caplan JL, Kumar AS, Park E, Padmanabhan MS, Hoban K, Modla S, Czymmek K, S.  
755 Dinesh-Kumar P (2015) Chloroplast stromules function during innate immunity. *Dev*  
756 *Cell* 34(1): 45–57

757 Cappadocia L, Marechal A, Parent JS, Lepage E, Sygusch J, Brisson N (2010)  
758 Crystal structures of DNA-Whirly complexes and their role in Arabidopsis organelle  
759 genome repair. *Plant Cell* 22: 1849-1867

760 Cappadocia L, Parent JS, Zampini E, Lepage E, Sygusch J, Brisson N (2012) A  
761 conserved lysine residue of plant Whirly proteins is necessary for higher order  
762 protein assembly and protection against DNA damage. *Nucleic Acids Res* 40:  
763 258-269

764 Chan KX, Phua SY, Crisp P, McQuinn R, Pogson, BJ (2016). Learning the languages  
765 of the chloroplast: Retrograde signaling and beyond. *Annu. Rev. Plant Biol.* 67: 25–  
766 53.

767 Chaouch S, Queval G, Vanderauwera S, Mhamdi A, Vandenabeele M, Langlois-Meurinne  
768 M, Van Breusegem F, Saindrenan P, Noctor G. (2010) Peroxisomal hydrogen  
769 peroxide is coupled to biotic defense responses by ISOCHORISMATE  
770 SYNTHASE1 in a daylength-related manner. *Plant Physiol.* 2010 153(4):1692-705.

771 Chezem WR, Memon A, Li FS, Weng JK, Clay NK. (2017) SG2-Type R2R3-MYB  
772 Transcription Factor MYB15 Controls Defense-Induced Lignification and Basal  
773 Immunity in Arabidopsis. *Plant Cell* 29(8):1907-1926

- 774 Comadira G, Rasool B, Kaprinska B, Garcia BM, Morris J, Verrall SR, Bayer M,  
775 Hedley PE, Hancock RD, Foyer CH (2015) WHIRLY1 Functions in the Control of  
776 Responses to Nitrogen Deficiency But Not Aphid Infestation in Barley. *Plant Physiol*  
777 168: 1140-1151
- 778 Dat JF, Lopez-Delgado H, Foyer CH, Scott IM (1998) Parallel changes in H<sub>2</sub>O<sub>2</sub> and  
779 catalase during thermotolerance induced by salicylic acid or heat acclimation in  
780 mustard seedlings. *Plant Physiol* 116: 1351-1357
- 781 Dean JV, Delaney SP (2008) Metabolism of salicylic acid in wild-type, *ugt74f1* and  
782 *ugt74f2* glucosyltransferase mutants of *Arabidopsis thaliana*. *Physiol Plant*  
783 132(4):417–425.
- 784 Dempsey DA, Vlot AC, Wildermuth MC, Klessig DF (2011) Salicylic Acid biosynthesis  
785 and metabolism. *Arabidopsis Book* 9: e0156
- 786 Desveaux D, Despres C, Joyeux A, Subramaniam R, Brisson N (2000) PBF-2 is a  
787 novel single-stranded DNA binding factor implicated in PR-10a gene activation in  
788 potato. *Plant Cell* 12: 1477-1489
- 789 Desveaux D, Marechal A, Brisson N (2005) Whirly transcription factors: defense gene  
790 regulation and beyond. *Trends Plant Sci* 10: 95-102
- 791 Desveaux D, Subramaniam R, Despres C, Mess JN, Levesque C, Fobert PR, Dangl  
792 JL, Brisson N (2004) A "Whirly" transcription factor is required for salicylic  
793 acid-dependent disease resistance in *Arabidopsis*. *Dev Cell* 6: 229-240
- 794 Duan J, Lee KP, Dogra V, Zhang S, Liu K, Caceres-Moreno C, Lv S, Xing W, Kato Y,

- 795 Sakamoto W, Liu R, Macho AP, Kim C (2019) Impaired PSII Proteostasis Promotes  
796 Retrograde Signaling via Salicylic Acid. *Plant Physiol* 180(4):2182-2197
- 797 Estavillo GM, Crisp PA, Pornsiriwong W, Wirtz M, Collinge D, Carrie C, Giraud E,  
798 Whelan J, David P, Javot H, Brearley C, Hell R, Marin E, Pogson BJ (2011)  
799 Evidence for a SAL1-PAP chloroplast retrograde pathway that functions in drought  
800 and high light signaling in Arabidopsis. *Plant Cell* 23: 3992-4012
- 801 Foyer CH, Karpinska B, Krupinska K (2014) The functions of WHIRLY1 and  
802 REDOX-RESPONSIVE TRANSCRIPTION FACTOR 1 in cross tolerance  
803 responses in plants: a hypothesis. *Philos Trans R Soc Lond B Biol Sci* 369:  
804 20130226
- 805 Friedrich L, Vernooij B, Gaffney T, Morse A, Ryals J (1995) Characterization of  
806 tobacco plants expressing a bacterial salicylate hydroxylase gene. *Plant Mol Biol*  
807 29(5):959–968.
- 808 Gawroński P, Górecka M, Bederska M, Rusaczonek A, Ślesak I, Kruk J, Karpiński S.  
809 (2013) Isochorismate synthase 1 is required for thylakoid organization, optimal  
810 plastoquinone redox status, and state transitions in *Arabidopsis thaliana*. *J Exp Bot*  
811 64(12):3669-79..
- 812 Garcion C, Lohmann A, Lamodièrre E, Catinot J, Buchala A, Doermann P, Métraux JP  
813 (2008) Characterization and biological function of the ISOCHORISMATE  
814 SYNTHASE2 gene of *Arabidopsis*. *Plant Physiol* 147(3):1279–1287.
- 815 Grabowski E, Miao Y, Mulisch M, Krupinska K (2008) Single-stranded DNA-binding

816 protein Whirly1 in barley leaves is located in plastids and the nucleus of the same  
817 cell. *Plant Physiol* 147: 1800-1804

818 Guo P, Li Z, Huang P, Li B, Fang S, Chu J, Guo H.(2017) A Tripartite Amplification  
819 Loop Involving the Transcription Factor WRKY75, Salicylic Acid, and Reactive  
820 Oxygen Species Accelerates Leaf Senescence. *Plant Cell* 29(11):2854-2870.

821 Hellens RP, Allan AC, Friel EN, Bolitho K, Grafton K, Templeton MD, Karunairetnam S,  
822 Gleave AP, Laing WA (2005) Transient expression vectors for functional genomics,  
823 quantification of promoter activity and RNA silencing in plants. *Plant Methods* 1: 13

824 Hinderhofer K, Zentgraf U (2001) Identification of a transcription factor specifically  
825 expressed at the onset of leaf senescence. *Planta* 213: 469-473

826 Huang D, Lin W, Deng B, Ren Y, Miao Y (2017) Dual-Located WHIRLY1 Interacting  
827 with LHCA1 Alters Photochemical Activities of Photosystem I and Is Involved in  
828 Light Adaptation in Arabidopsis. *Int J Mol Sci* 18

829 Huang J, Gu M, Lai Z, Fan B, Shi K, Zhou YH, Yu JQ, Chen Z (2010) Functional  
830 analysis of the Arabidopsis PAL gene family in plant growth, development, and  
831 response to environmental stress. *Plant Physiol* 153: 1526-1538

832 Huang L, Yu LJ, Zhang X, Fan B, Wang FZ, Dai YS, Qi H, Zhou Y, Xie LJ, Xiao S  
833 (2019) Autophagy regulates glucose-mediated root meristem activity by modulating  
834 ROS production in Arabidopsis. *Autophagy* 15: 407-422

835 Irizarry RA, Hobbs B, Collin F, Beazer-Barclay YD, Antonellis KJ, Scherf U, Speed TP  
836 (2003) Exploration, normalization, and summaries of high density oligonucleotide



837 array probe level data. *Biostatistics* 4: 249–264

838 Isemer R, Mulisch M, Schafer A, Kirchner S, Koop HU, Krupinska K (2012)

839 Recombinant Whirly1 translocates from transplastomic chloroplasts to the nucleus.

840 *FEBS Lett* 586: 85-88

841 Kacprzak SM, Mochizuki N, Naranjo B, Xu D, Dario Leister D, Kleine T, Okamoto H,

842 Terry MJ (2019) Plastid-to-Nucleus Retrograde Signalling during Chloroplast

843 Biogenesis Does Not Require ABI4. *Plant Physiol* 179:18–23

844 Katari MS, Nowicki SD, Aceituno FF, Nero D, Kelfer J, Thompson LP, Cabello JM,

845 Davidson RS, Goldberg AP, Shasha DE, Coruzzi GM, Gutiérrez RA (2010)

846 VirtualPlant: A Software Platform to Support Systems Biology Research *Plant*

847 *Physiol* 152, 500–51.

848 Kim SH, Kim HS, Bahk S, An J, Yoo Y, Kim JY, Chung WS (2017) Phosphorylation of

849 the transcriptional repressor MYB15 by mitogen-activated protein kinase 6 is

850 required for freezing tolerance in *Arabidopsis*. *Nucleic Acids Res* 45(11):6613-6627

851 Kleine T, Leister D (2016) Retrograde signaling: Organelles go networking. *Biochim*

852 *Biophys Acta* 1857: 1313-1325

853 Kleine T, Voigt C, Leister D (2009) Plastid signalling to the nucleus. *Trends Genet* 25:

854 185-192

855 Kong F, Zhang S, Yang M, Liu Z, Wang Y, Ma N, Meng Q. (2018) Whirly1 enhances

856 the tolerance to chilling stress in tomato via protection of Photosystem II and

857 regulation of starch degradation. *New Phytologist*

- 858 Koussevitzky S, Nott A, Mockler TC, Hong F, Sachetto-Martins G, Surpin M, Lim J,  
859 Mittler R, Chory J (2007) Signals from chloroplasts converge to regulate nuclear  
860 gene expression. *Science* 316: 715-719
- 861 Krause K, Kilbiński I, Mulisch M, Rodiger A, Schafer A, Krupinska K (2005)  
862 DNA-binding proteins of the Whirly family in *Arabidopsis thaliana* are targeted to  
863 the organelles. *FEBS Lett* 579: 3707-3712
- 864 Krause K, Krupinska K (2009) Nuclear regulators with a second home in organelles.  
865 *Trends Plant Sci* 14: 194-199
- 866 Krupinska K, Dähnhardt D, Fischer-Kilbiński I, Kucharewicz W, Scharrenberg C,  
867 Trösch M, Buck F (2013) Identification of WHIRLY1 as a Factor Binding to the  
868 Promoter of the Stress- and Senescence-Associated Gene HvS40. *J of Plant*  
869 *Growth Reg* 33: 91-105
- 870 Kucharewicz W, Distelfeld A, Bilger W, Müller M, Munné-Bosch S, Hensel G,  
871 Krupinska K (2017) Acceleration of leaf senescence is slowed down in transgenic  
872 barley plants deficient in the DNA/RNA-binding protein WHIRLY1. *J of Exp Bot* 68(5)  
873 983–996
- 874 Kumazaki A, Suzuki N. (2019) Enhanced tolerance to a combination of heat stress  
875 and drought in *Arabidopsis* plants deficient in ICS1 is associated with modulation of  
876 photosynthetic reaction center proteins. *Physiol Plant* 165(2):232-246.
- 877 Lee BH, Lee H, Xiong L, Zhu JK. (2002) A mitochondrial complex I defect impairs  
878 cold-regulated nuclear gene expression. *Plant Cell* 14: 1235–1251

- 879 Lee S, Kim SG, Park CM (2010) Salicylic acid promotes seed germination under high  
880 salinity by modulating antioxidant activity in Arabidopsis. *New Phytol* 188: 626-637
- 881 Lescot M, Deohais P, Thijs G, Marchal K, Moreau Y, Van de Peer Y, Rouz P and  
882 Rombauts S. (2002) PlantCARE, a database of plant cis-acting regulatory  
883 elements and a portal to tools for in silico analysis of promoter sequences. *Nucleic  
884 Acids Res* 30(1):325-327
- 885 Leon J, Lawton MA, Raskin I (1995) Hydrogen Peroxide Stimulates Salicylic Acid  
886 Biosynthesis in Tobacco. *Plant Physiol* 108: 1673-1678
- 887 Leon J, Shulaev V, Yalpani N, Lawton MA, Raskin I (1995) Benzoic acid  
888 2-hydroxylase, a soluble oxygenase from tobacco, catalyzes salicylic acid  
889 biosynthesis. *Proc Natl Acad Sci U S A* 92: 10413-10417
- 890 Lepage E, Zampini E, Brisson N (2013) Plastid genome instability leads to reactive  
891 oxygen species production and plastid-to-nucleus retrograde signaling in  
892 Arabidopsis. *Plant Physiol* 163: 867-881
- 893 Lim EK, Doucet CJ, Li Y, Elias L, Worrall D et al. (2002) The activity of Arabidopsis  
894 glycosyltransferases toward salicylic acid, 4-hydroxybenzoic acid, and other  
895 benzoates. *J Biol Chem* 277(1):586–592.
- 896 Lin W, Zhang H, Hong Z, Miao Y, Lin W (2016) A general method for detection the  
897 content of endogenous salicylic acid in plant leaf by HPLC. *J Fujian Agri & Fore Uni*  
898 46:109-114
- 899 Lin W, Huang D, Shi X, Deng B, Ren Y, Lin W, Miao Y, (2019) H<sub>2</sub>O<sub>2</sub> as a Feedback

900 Signal on Dual-Located WHIRLY1 Associates with Leaf Senescence in Arabidopsis.  
901 Cells 8:1585

902 Love AJ, Milner JJ, Sadanandom A (2008) Timing is everything: Regulatory overlap in  
903 plant cell death. Trends Plant Sci 13(11):589–595;

904 Lv R, Li Z, Li M, Dogra V, Lv S, Liu R, Lee KP, Kim C. (2019) Uncoupled Expression of  
905 Nuclear and Plastid Photosynthesis-Associated Genes Contributes to Cell Death in  
906 a Lesion Mimic Mutant. Plant Cell 31(1):210-230.

907 Martínez C, Pons E, Prats G, León J. (2004) Salicylic acid regulates flowering time  
908 and links defence responses and reproductive development. Plant J 37(2):209-17.

909 Melonek J, Mulisch M, Schmitz-Linneweber C, Grabowski E, Hensel G, Krupinska K  
910 (2010) Whirly1 in chloroplasts associates with intron containing RNAs and rarely  
911 co-localizes with nucleoids. Planta 232: 471-481

912 Miao Y, Jiang J, Ren Y, Zhao Z (2013) The single-stranded DNA-binding protein  
913 WHIRLY1 represses WRKY53 expression and delays leaf senescence in a  
914 developmental stage-dependent manner in Arabidopsis. Plant Physiol 163:  
915 746-756

916 Miao Y, Zentgraf U (2007) The antagonist function of Arabidopsis WRKY53 and  
917 ESR/ESP in leaf senescence is modulated by the jasmonic and salicylic acid  
918 equilibrium. Plant Cell 19: 819-830

919 Morris K., Soheila A.-H.-M., Page T., John C. F., Murphy A. M., Carr J. P., et al. (2003).  
920 Salicylic acid has a role in regulating gene expression during leaf senescence.

- 921 Plant J 23, 677–685.
- 922 Nevarez PA, Qiu Y, Inoue H, Yoo CY, Benfey PN, Schnell DJ, Chen M (2017)
- 923 Mechanism of Dual Targeting of the Phytochrome Signaling Component
- 924 HEMERA/pTAC12 to Plastids and the Nucleus. *Plant Physiol* 173: 1953-1966
- 925 Park SW, Kaimoyo E, Kumar D, Mosher S, Klessig DF (2007) Methyl salicylate is a
- 926 critical mobile signal for plant systemic acquired resistance. *Science*
- 927 318(5847):113–116.
- 928 Pesaresi P, Kim C (2019) Current understanding of GUN1: a key mediator involved in
- 929 biogenic retrograde signaling. *Plant Cell Rep* 38(7):819-823.
- 930 Prikryl J, Watkins KP, Friso G, van Wijk KJ, Barkan A (2008) A member of the Whirly
- 931 family is a multifunctional RNA- and DNA-binding protein that is essential for
- 932 chloroplast biogenesis. *Nucleic Acids Res* 36: 5152-5165
- 933 Rao MV, Paliyath G, Ormrod DP, Murr DP, Watkins CB (1997) Influence of salicylic
- 934 acid on H<sub>2</sub>O<sub>2</sub> production, oxidative stress, and H<sub>2</sub>O<sub>2</sub>-metabolizing enzymes.
- 935 Salicylic acid-mediated oxidative damage requires H<sub>2</sub>O<sub>2</sub>. *Plant Physiol* 115:
- 936 137-149
- 937 Rekhter D, Lüdke D, Ding Y, Feussner K, Zienkiewicz K, Lipka V, Wiermer M, Zhang Y,
- 938 Feussner I (2019) Isochorismate-derived biosynthesis of the plant stress hormone
- 939 salicylic acid. *Science* 365, 498–502
- 940 Ren Y, Li Y, Jiang Y, Wu B, Miao Y (2017) Phosphorylation of WHIRLY1 by CIPK14
- 941 Shifts Its Localization and Dual Functions in Arabidopsis. *Mol Plant* 10: 749-763

- 942 Rivas-San Vicente M, Plasencia J (2011) Salicylic acid beyond defence: Its role in  
943 plant growth and development. *J Exp Bot* 62(10):3321–3338.
- 944 Rohde A, Morreel K, Ralph J, Goeminne G, Hostyn V, De Rycke R, Kushnir S, Van  
945 Doorselaere J, Joseleau JP, Vuylsteke M, Van Driessche G, Van Beeumen J,  
946 Messens E, Boerjan W (2004) Molecular phenotyping of the *pal1* and *pal2* mutants  
947 of *Arabidopsis thaliana* reveals far-reaching consequences on phenylpropanoid,  
948 amino acid, and carbohydrate metabolism. *Plant Cell* 16: 2749-2771
- 949 Sardar A, Nandi AK, Chattopadhyay (2017) CBL-interacting protein kinase 6  
950 negatively regulates immune response to *Pseudomonas syringae* in *Arabidopsis*. *J*  
951 *Exp Bot* 68(13):3573-3584
- 952 Sarrion-Perdigones A, Vazquez-Vilar M, Palací J, Castelijn B, Forment J, et al. (2013)  
953 GoldenBraid 2.0: A Comprehensive DNA Assembly Framework for Plant Synthetic  
954 Biology. *Plant Physiol* 162: 1618–1631
- 955 Sun X, Feng P, Xu X, Guo H, Ma J, Chi W, Lin R, Lu C, Zhang L (2011) A chloroplast  
956 envelope-bound PHD transcription factor mediates chloroplast signals to the  
957 nucleus. *Nat Commun* 2: 477
- 958 Swida-Barteczka A, Krieger-Liszkay A, Bilger W, Voigt U, Hensel G,  
959 Szweykowska-Kulinska Z, Krupinska K (2018) The plastid-nucleus located  
960 DNA/RNA binding protein WHIRLY1 regulates microRNA-levels during stress in  
961 barley (*Hordeum vulgare* L.). *RNA Biol* DOI: 10.1080/15476286.2018.1481695
- 962 Thimm O, Blasing O, Gibon Y, Nagel A, Meyer S, Kruger P, Selbig J, Muller LA, Rhee

- 963 SY, Stitt M (2004) MAPMAN: a user-driven tool to display genomics data sets onto  
964 diagrams of metabolic pathways and other biological processes. *Plant J* 37:  
965 914-939
- 966 Torrens-Spence M, Bobokalonova A, Cartallo V, Glinkerman C, Pluskai T, Weng J  
967 (2019) PBS3 and EPS1 complete salicylic acid biosynthesis from isochorismate in  
968 *Arabidopsis*. *Mol Plant* DOI:j.molp.2019.11.005
- 969 Vallon O, Hoyer-Hansen G, Simpson DJ (1987) Photosystem II and cytochrome b559  
970 in the stroma lamellae of barley chloroplasts. *Carlsberg Research Communications*  
971 52: 405-421
- 972 Verberne MC, Brouwer N, Delbianco F, Linthorst HJ, Bol JF, Verpoorte R (2002)  
973 Method for the extraction of the volatile compound salicylic acid from tobacco leaf  
974 material. *Phytochem Anal* 13: 45-50
- 975 Vlot AC, Dempsey DA, Klessig DF (2009) Salicylic acid, a multifaceted hormone to  
976 combat disease. *Annu Rev Phytopathol* 47:177–206.
- 977 Vogelmann K, Drechsel G, Bergler J, Subert C, Philippar K, Soll J, Engelmann JC,  
978 Engelsdorf T, Voll LM, Hoth S (2012) Early senescence and cell death in  
979 *Arabidopsis saul1* mutants involves the PAD4-dependent salicylic acid pathway.  
980 *Plant Physiol* 159: 1477-1487
- 981 Wang X, Ding Y, Li Z, Shi Y, Wang J, Hua J, Gong Z, Zhou JM, Yang S (2019) PUB25  
982 and PUB26 Promote Plant Freezing Tolerance by Degrading the Cold Signaling  
983 Negative Regulator MYB15. *Dev Cell* 51(2):222-235

- 984 Wildermuth MC, Dewdney J, Wu G, Ausubel FM (2001) Isochorismate synthase is  
985 required to synthesize salicylic acid for plant defence. *Nature* 414(6863):562–565.
- 986 Woodson JD, Perez-Ruiz JM, Chory J (2011) Heme synthesis by plastid  
987 ferrochelatase I regulates nuclear gene expression in plants. *Curr Biol* 21: 897-903
- 988 Woodson JD, Perez-Ruiz JM, Schmitz RJ, Ecker JR, Chory J. (2013) Sigma  
989 factor-mediated plastid retrograde signals control nuclear gene expression. *Plant J*  
990 73(1):1-13.
- 991 Wu GZ, Meyer EH, Richter AS, Schuster M, Ling Q, Schöttler MA, Walther D, Zoschke  
992 R, Grimm B, Jarvis RP, Bock R. (2019) Control of retrograde signalling by protein  
993 import and cytosolic folding stress. *Nat Plants* 5(5):525-538.
- 994 Xiong JY, Lai CX, Qu Z, Yang XY, Qin XH, Liu GQ (2009) Recruitment of AtWHY1 and  
995 AtWHY3 by a distal element upstream of the kinesin gene AtKP1 to mediate  
996 transcriptional repression. *Plant Mol Biol* 71: 437-449
- 997 Yamamoto S, Katagiri M, Maeno H, Hayaishi O (1965) Salicylate hydroxylase, a  
998 monooxygenase requiring flavin adenine dinucleotide: I. purification and general  
999 properties. *J Biol Chem* 240(8):3408–3413.
- 1000 Yoo HH, Kwon C, Lee MM, Chung IK (2007) Single-stranded DNA binding factor  
1001 AtWHY1 modulates telomere length homeostasis in Arabidopsis. *Plant J* 49:  
1002 442-451
- 1003 Zhang K, Halitschke R, Yin C, Liu C, and Gan S (2013) Salicylic acid 3-hydroxylase  
1004 regulates Arabidopsis leaf longevity by mediating salicylic acid catabolism. *PNAS*



1005 110 ( 36): 14807–14812

1006 Zhang Z, Li Q, Li Z, Staswick PE, Wang M, Zhu Y, He Z (2007) Dual regulation role of  
1007 GH3.5 in salicylic acid and auxin signaling during Arabidopsis-Pseudomonas  
1008 syringae interaction. Plant Physiol 145(2):450–

1009 Zhao Y, Luo L, Xu J, Xin P, Guo H, Wu J, Bai L, Wang G, Chu J, Zuo J, Yu H, Huang X  
1010 and Li J (2018) Malate transported from chloroplast to mitochondrion triggers  
1011 production of ROS and PCD in Arabidopsis thaliana. Cell Research 28:1-14

1012

### 1013 Figure legends

1014 Figure 1. The variation transcript level of genes encoding key enzymes related to SA  
1015 metabolism pathway and SA contents in the *why1* line during the development

1016 a. SA metabolism pathway in the cell. b The variation transcript level of genes encoding key  
1017 enzymes related to SA metabolism in the *why1* line during plant development. c. Content of  
1018 conjugated (C-SA) and free (F-SA) salicylic acid in wild type and *why1* mutant during the  
1019 period of 28 to 55 days after germination (dag); d. Changes of conjugated and free salicylic  
1020 acid contents in a series of double mutants with focus on 37 and 42 dag. f. Senescence  
1021 phenotype of 37 dag old double mutants.

1022 The relative expression level normalized to GAPC, wild type at 28 dag (b) was setup as 1. The  
1023 standard error bars present three time biological replicates and three time techniques  
1024 replicates, the values are shown as means  $\pm$ SD. Asterisks (\*P < 0.05, \*\*P < 0.01) show  
1025 significant differences to wild type line according to either two-way ANOVA or pair-wide

1026 multiple t-tests.

1027 Figure 2. Transcript level analysis of genes encoding key enzymes related to SA metabolism  
1028 pathway (a) and SA contents (b) in the *pWHY1/why1*, *nWHY1/why1*, and *pnWHY1/why1*  
1029 transgenic plants compared to wild type from 28 to 42 dag during plant development.

1030 The standard error bars present three time biological replicates, the values are shown as  
1031 means±SE. Asterisks (\*P < 0.05, \*\*P < 0.01) show significant differences to WT within the  
1032 respective conditions according to Student's t test.

1033 Figure 3. The *VEX:pWHY1*, *VEX:nWHY1* and the *why1* mutants exhibits a complex nuclear  
1034 genetic reprogramming.

1035 a. MapMan analysis for gene ontology terms enrichment of the entire *VEX:pWHY1*,  
1036 *VEX:nWHY1* and the *why1* nuclear transcriptome.

1037 b. Histogram presenting the ratio of differentially expressed genes enrichment changes of  
1038 selected biological process of the *VEX:pWHY1*, *VEX:nWHY1* and the *why1* transcriptome.

1039 c. The heatmap of SA metabolism related gene expression levels of the *pWHY1/why1*,  
1040 *nWHY1/why1*, *pnWHY1/why1* plants, and the *why1* mutants. *VEX:pWHY1*,  
1041 *VEX:pWHY1/why1*; *VEX:nWHY1*, *VEX:nWHY1/why1*

1042 Figure 4. WHY1 activates/represses target gene expression

1043 b. Enrichment profiles of WHY1 protein in five target genes: *ERF109*, *MYB15*, *ICS1*,  
1044 *WRKY53*, and *WRKY33* by ChIP-seq; b.Position of promoter motives (*GTNNNNAAT plus*  
1045 *AT-rich*) of WHY1 target genes; c. Enrichment folds of WHY1 at the promoters of target genes  
1046 by ChIP-qPCR at 37 and 42 days after germination; d. The expression levels of target genes

1047 at 37 and 42 days after germination in the *why1* mutant compared to WT. The error bars  
1048 represented SD from three biological replicates. Asterisks indicated significant differences  
1049 from the ACTIN according to two-tail Student's t test (\* denotes  $P < 0.05$ , \*\* for  $P < 0.01$ ).

1050 Figure 5. Promoter activation assays using the LUC/REN system

1051 a. Structure of activator and reporter constructs. b. The promoters of *ICS1*, *MYB15*, *ERF109*,  
1052 *WRKY53*, and *WRKY33* genes are co-infiltrated with a vector containing WHY1 under the  
1053 regulation of the ACTIN promoter. c, Co-infiltration of MYB15 and ERF109 with the *PAL1*,  
1054 *PAL2*, *ICS1*, and *BSMT1* promoters. Background promoter activity is assayed by  
1055 co-infiltration with an empty vector of the same type. Shown are means and SE of six  
1056 biological replicates. Asterisks denote statistically significant differences from the empty  
1057 vector calculated using Student's t test: \*,  $P < 0.05$ ; \*\*,  $P < 0.01$ ; and \*\*\*,  $P < 0.001$ .

1058 Figure 6. Phenotyping of loss- of *WHY1* and its downstream target genes mutants

1059 a. Phenotypes of loss-of *PAL1*, *ICS1*, *MYB15* and *BSMT1* at 37dag compared to *WHY1*  
1060 mutants. Whole rosette (a-up) and senescent leaf ratio of 5 plants (a-down); b. ROS  
1061 accumulation of loss-of *PAL1*, *ICS1*, *MYB15* and *BSMT1* at 37dag compared to *WHY1*  
1062 mutants by NBT and DAB staining; c. The transcript levels of SAGs genes in the loss- or gain-  
1063 of *PAL1*, *BSMT1* and loss- of *MBY15*, *ERF109* and *ICS1* plants at 37dag by qRT-PCR. The  
1064 standard error is calculated from three biological replicates, the values are shown as  
1065 means $\pm$ SE, the wild-type was setup to 1 in the heatmap.

1066 Figure 7. The plastid and nuclear isoform WHY1 protein immunodetection after the treatment  
1067 of MeSA and in the *sid2*, *pal1* or double *sid2 pal1* mutants compared to WT

1068 a. The expression level of WHY1 in the WT plants after MeSA treatment for 1, 2, 4, 6, 8 hrs; b.  
1069 WHY1 immunodetection in nuclear extracts after the treatment of MeSA for 4 hours, and in  
1070 the *sid2*, *pal1* or double *sid2 pal1* mutants compared to WT; c. WHY1 immunodetection in  
1071 plastid extracts after the treatment of MeSA for 4 hours, and in the *sid2*, *pal1* or double *sid2*  
1072 *pal1* mutants compared to WT. Coomassie and silver staining as the protein amount loading  
1073 controls. L-WHY1: large size (37 kDa) of WHY1; S-WHY1: small size (29 kDa) of WHY1. The  
1074 antibody against peptide WHY1 was prepared by company; d. The alteration of pWHY1 and  
1075 nWHY1 after MeSA treatment or in the *sid2*, *pal1* or double *sid2 pal1* mutants compared to  
1076 WT. The protein band signal is captured and calculated by Image J software program  
1077 (<http://www.di.uq.edu.au/sparqimagejblots>). The data shows the average of three replicates.  
1078 Asterisks (\*P < 0.05, \*\*P < 0.01) show significant differences to H<sub>2</sub>O treatment or WT  
1079 according to Student's t test.

1080 Figure 8. A working model of the senescence pathway performed by the dual located WHY1  
1081 in response to SA. The nuclear isoforms of WHY1 are represented as both a large molecular  
1082 mass (37 kDa, bigger letters in the Figure) and a small molecular mass (29 kDa, smaller  
1083 letters). WHY1 has dual functions in plastids and the nucleus. Loss of WHY1 increases SA  
1084 accumulation at early stage (37 dag) through increasing PAL1 expression and repressing  
1085 BSMT1; Elevated SA promotes nuclear WHY1 de-modification and promotes ICS1 and  
1086 BSMT1 expression thereby balancing SA homeostasis in the cells. High SA levels by ICS1  
1087 cause feedback enhancing ROS accumulation, promoting senescence. pWHY1 stimulates  
1088 PAL1/ICS1 expression but represses BSMT1, allowing high levels of SA, leading also to early

1089 senescence. Thus, distribution of WHY1 organelle isoforms and the putative feedback of SA  
1090 form a circularly integrated regulatory network during plant senescence in a developmental  
1091 dependent manner. Plastid (Chl) is shown as a green ovary, nucleus (Nuc) as a grey ovary,  
1092 lines for regulation, fat arrows for transfer or translocation, broken lines for uncertainty
